## Title

# Pre-neuronal processing of haptic sensory cues via dispersive high-frequency vibrational modes

## Authors

Yu Ding<sup>†</sup> and Yurii Vlasov<sup>\* †, ‡, §, ||</sup>

## Affiliations

University of Illinois Urbana Champaign

<sup>†</sup> Department of Physics,

<sup>‡</sup> Department of Bioengineering,

<sup>§</sup> Carle Illinois College of Medicine,

<sup>||</sup> Department of Electrical and Computer Engineering.

\*Corresponding author: Yurii Vlasov. Email: [yvlasov@illinois.edu](mailto:yvlasov@illinois.edu)

## Abstract

Sense of touch is one of the major channels of perception. Neural coding of object features conveyed by rodents' whiskers has been a model to study early stages of haptic information uptake. While high-precision spike timing has been observed during whisker sweeping across textured surfaces, the exact nature of whisker micromotions that spike trains encode remained elusive. Here, we discovered that whisker swept over textured object vibrates with a regular series of higher order vibrational modes spanning frequencies up to 10KHz. These high frequency modes carry up to 80% of vibrational energy, exhibit 100X smaller damping ratio, and propagate along the whisker 10X faster, that makes them the fastest and the most powerful messengers of shockwaves generated by micro-collisions with surface roughness. We conclude that a whisker is a dispersive pre-neuronal processor that transforms tactile information into a time sequenced code with ultra-high information capacity that contributes to haptic perception.

## INTRODUCTION

Rodents use their mystacial vibrissae (whiskers) to explore the environment and gather information about nearby objects [1]. Active back and forth rhythmic movement of whiskers over objects (whisking) is used to produce a neural representation of a complex tactile scenes enabling rodents to locate objects [2-4], to perform object recognition [5], to guide their locomotion along walls [6, 7], and to navigate in their natural habitat of dark burrows and tunnels [8]. Whiskers themselves are not innervated. Instead, numerous collisions of moving whiskers with objects produce time-varying forces at the whisker follicle [9, 10] that are picked by mechanosensitive nerve endings (mechanoreceptors) of the primary sensory neurons [11] in the trigeminal ganglion (TG) [12] to produce a barrage of neural discharges that is then directed to thalamo-cortical circuits generating haptic perception.

While the primary sensory neurons can perform complex computations [13-20], it is well recognized, however, that transduction of whisker collisions into forces at the whisker base is by itself a nonlinear process that effectively contributes to coding of haptic features and is often dubbed as a “pre-neuronal processing” [21, 22]. Biophysical properties of the whisker [9, 10] as its length [5], taper [23], intrinsic curvature [24] and central medulla [25], as well as the surrounding follicle tissue [26], all contribute to complex transduction over large range of frequencies up to thousands of Hertz.

Transduction of quasi-steady-state whisker bending moments and forces into spike rate coding for azimuthal and radial localization is relatively well understood [3, 9, 17, 27, 28]. Perception of texture [29] is a more complex process that is likely mediated by high frequency whisker micromotions [22, 30, 31]. One of the proposed transduction hypothesis considers an individual whisker as a resonant oscillator whose fundamental frequency depends on the whisker length [31-33]. Considering all whiskers across a mystacial pad having different length, hence driving different neuronal responses, such differential frequency tuning can be the origin of texture discrimination. An alternative “stick-slip” hypothesis [22, 34-38] considers a time sequence of sticking and slipping events when whisker is rubbed over a rough surface. Such “stick-slip” patterns of whisker movements result in fast variation of angular velocity [37], and associated angular acceleration peaks [34, 36] that are shown to drive cortical activity [35]. Neuronal spiking is found to be highly synchronized to stick-slip acceleration peaks with less than 2ms jitter in primary somatosensory cortex [35, 38], sub-milliseconds in thalamus [39], and as small as 10 $\mu$ s in primary afferents [40]. These characteristic times correspond to frequencies of whisker micromotions extending beyond 10-500Hz that are typically studied with high-speed video recordings with subsequent image analysis [41, 42]. What aspects of such fast and complex spatiotemporal micromotions of a whisker are contributing to generation of these precisely timed spike trains? Knowing “what” is encoded in a spike trains may shed light on “how” this information is decoded and processed in thalamo-cortical neural circuits to produce tactile perception.

Here, using highly sensitive acoustical methods we performed a systematic study of whisker micromotions and identified a regular series of higher order vibrational modes (up to 30) spanning frequencies up to 10KHz. We formulate a dispersive vibrational transduction hypothesis that considers a whisker a dispersive pre-neuronal processor that transforms high-frequency micromotions into an efficient temporal code with ultra-high Kb/s bandwidth.

## RESULTS

### **Whisker micromotions are segregated into distinct vibrational bands extending to 10KHz**

Traditionally, whisker micromotions are studied using fast video recordings at a few KHz frame rate. While it is possible to detect whisker shape distortions up to 300Hz [43] and even measure the propagation speed of a shockwave [44], studies of micromotions at frequencies beyond a few hundred Hz are challenging in part due to a dynamic range of the videography method that is limited to just a few dB. Instead, here, to study high frequency whisker micromotions, we utilized the acoustical

methods that provide calibrated measurements of the forces at the whisker base covering over 50dB dynamic range over 10KHz bandwidth (SM Fig.S2).

Figure 1A shows a typical voltage trace recorded with a mouse C1 whisker swept against a metal pole (details in Materials and Methods). Analogous data recorded with a rat whisker are shown in Fig.1D. As observed with video recordings from the overhead and the sideview cameras (Fig.S1) the whisker, when moved concave forward (CF), is increasingly bending against the pole ( $t<0$ ) and is then slipping off the pole at  $t=0$  to vibrate freely in the air. Resulting vibrations produce high voltage signals within a first few milliseconds after the slip-off followed by gradual decay. Complex oscillatory pattern is composed of both low frequency oscillations with a period of a few ms that are dominant at longer times, as well as much faster signals. Decreasing the distance between the pole and the whisker tip results in increase of the signal amplitude (Fig.S3A,B). Consecutive trimming of the whisker from the tip side results in both increase of the signal amplitude and significant changes in the oscillatory patterns (Fig.S3C,D).

Spectral analysis of these vibrations was performed using a continuous Complex Morlet Wavelet (CMW) transformation (see Materials and Methods). The resulting CMW spectrogram is shown in Fig.1B with a log-scale color coding of the absolute value of wavelet coefficients. The spectrum extends to frequencies up to 10KHz well beyond previously published observations. Vibrations are segregated into distinct vibrational bands with the spectral distance between the peaks increasing with frequency. Such regular patterns are highly reproducible in many consecutive sweeps (SM Movie.1). To identify spectral positions of these vibrational bands, the spectrum of the CMW transform amplitude (spectrogram cross-section at a given time delay) taken at 1ms delay for untrimmed 21.5mm long whisker is shown in Fig.1C (black curve). High contrast peaks with 30dB contrast ratio cover all the frequency range up to 10KHz. To better quantify the peak assignment a series of measurements were performed on the same whisker with consecutive trimming of the distal end down to a total arc length  $S_{tot} = 12\text{mm}$ .

The vibrational bands are shifting to higher frequencies and their spectral separation is increasing with shortening of the whisker. Analogous observations with a rat whisker are shown in Fig.1D,E,F

These modes, numbered from the lowest frequency fundamental mode ( $n=1$  at 63Hz for Fig1.B) up to the highest observed frequency band ( $n=14$  at 9430Hz for Fig.1B), can be assigned to transverse vibrational eigenmodes of a freely vibrating truncated conical Euler-Bernoulli beam model without dissipation [31, 32, 45] described by the equation:

$$f_j = \frac{R_b}{4\pi l S_{tot}} \sqrt{\frac{E}{\rho}} \gamma_j = \frac{R_b}{4\pi S_{tot}^2} \sqrt{\frac{E}{\rho}} \beta_j \quad \text{Eq.1}$$

where  $f_j$  is the linear natural frequency of the  $j$ -th mode,  $R_b$ ,  $\rho$ ,  $E$  represent whisker radius at the base, its density, and Young's modulus. The total arc length of the whisker before truncation is  $S_{tot}$ , and the arc length after truncation at the distal end is  $l$ . In deriving Eq.1 it is assumed that tapering is linear with length [9, 14, 24], although recent work has shown deviation from linearity [46]. The variables  $\beta_j$  ( $\gamma_j$ ) are the dimensionless coefficients for full (truncated) whisker that depend on the eigenmode number as well as on boundary conditions [47]. A table of  $\beta_j$  values calculated for the first 20 modes for the fixed-free boundary conditions for various whisker truncation is presented in the SM Table.S2.

### **Vibrational bands are Euler-Bernoulli transverse vibrational eigenmodes.**

To verify the assignment of the observed transient vibrational bands to transverse vibrational eigenmodes we performed numerical calculations of a time-dependent shear force generated at the base of the whisker after the slip-off using the analytical dynamic vibrational model [45] (see also Materials and Methods). The resulting shear force trace (Fig.2A) shows fast oscillations superimposed on slowly varying envelope. A CMW spectrogram in Fig.2B shows a series of individual vibration bands with

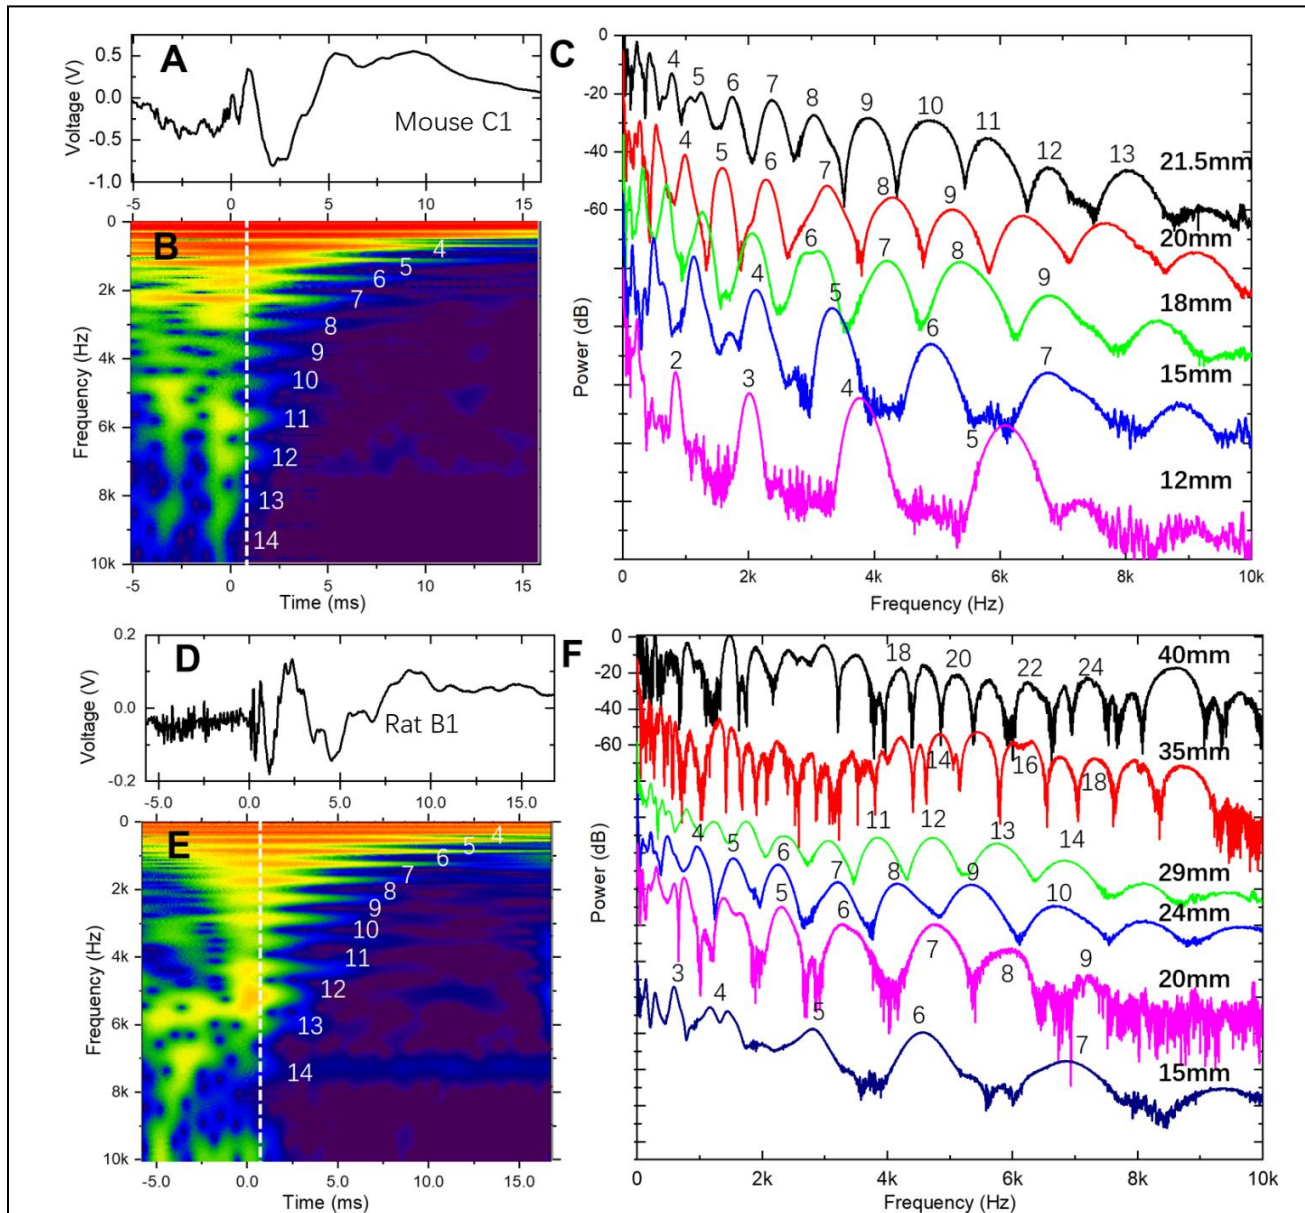

**Figure 1. Whisker micromotions segregate into distinct vibrational bands up to 10KHz.**

(A) Voltage trace recorded during whisker slip-off from the pole when swept in concave forward direction. C1 mouse whisker 21.5mm long with 70 $\mu$ m base diameter. Sweep rate 3.5Hz with position of the pole 10mm away from the whisker distal end. (B) Complex Morlet wavelet transformation spectrogram of the voltage trace in A). Color scheme represents the transform absolute magnitude in logarithmic scale. Vibrational bands are numbered starting from the fundamental mode. (C) Amplitude of the CMW transforms taken at 1ms time delay from the slip-off for the C1 mouse whisker that is consecutively trimmed from the original 21.5mm total arc length (black) down to 12mm (magenta). Corresponding transverse vibrational modes are numbered starting from the fundamental mode. Each curve is shifted vertically by a multiple of -20dB for clarity. (D) Voltage trace recorded during whisker slip-off from the pole when swept in concave forward direction. B1 mouse whisker 29mm long with 120 $\mu$ m base diameter trimmed from original 40mm total arc length. Sweep rate 3.5Hz with position of the pole 2mm away from the whisker distal end. (E) Complex Morlet wavelet transformation spectrogram of the voltage trace in D). Color scheme represents the transform absolute magnitude in logarithmic scale. Vibrational bands are numbered starting from the fundamental mode. (F) Spectra of the CMW amplitude taken at 1ms time delay from the slip-off for the B1 rat whisker that is consecutively trimmed from the original 40mm total arc length (black) down to 15mm (navy). Corresponding transverse vibrational modes are numbered starting from the fundamental mode. Each curve is shifted vertically by a multiple of -40dB for clarity.

frequencies closely matching experimentally observed values (compare with Fig.1E). Figure 2C compares experimental (blue) and calculated (red) CMW amplitude spectra taken at 1ms delay. Not only the frequency of the band peaks, but also the band shapes are well predicted by theoretical calculations except a noticeable difference for bands 5 and 10. While these two bands are clearly present in the experimental spectrum, their shape in the calculated spectrum is different. Calculated band 5 exhibits an inverted shape, while band 10 is almost skipped. In addition, while the amplitudes of mode maxima in the experimental spectrum show monotonous decrease with frequency, modes amplitudes in the theoretical spectrum vary with frequency in a highly nonregular manner.

Such effects are expected as modes phases and amplitudes depend strongly on specific location of a pole contact along the whisker length [45]. To illustrate this effect, we calculated a series of wavelet transform spectra for conditions similar to Fig.2A-C, but with varying pole position between 2mm and 5mm from the whisker tip (Fig.2D). Various pole positions result in a distinct redistribution of modes amplitudes as expected. Similar to the results of Fig.2C, a few bands (bands 7 and 10) show an inverse shape at 2mm pole location, which is restored to a normal shape for 5mm location.

Figure 2E shows the evolution of natural (i.e. undamped, see Materials and Methods) frequencies of transverse vibrational modes for the C1 mouse whisker that was consecutively trimmed from the initial 21.5mm arc length down to 12mm. Figure 2G shows analogous results for the B1 rat whisker that was consecutively trimmed from 40mm down to 12.5mm. The natural frequencies are plotted in a log-log scale to simultaneously compare evolution of both the low frequency and the higher order modes. Resonant frequency of a vibrational mode is identified from the CMW spectrogram (i.e., Fig.1C). However, the spectral shape of the lowest order modes in the CMW spectrograms is strongly affected by the cone of influence (see SM), making determination of the mode frequency unreliable. Therefore, to extract the frequency (and the damping ratio  $\zeta$ ) for the low order modes with frequencies below 200Hz, we used an alternative method based on the Fast Fourier Transform (FFT) bandpass filtering (Materials and Methods, see also Fig.S5).

Since density, whisker radii at the base and at the tip, truncation ratio, and whisker arc length are all known or measured parameters, all 49 experimental datapoints in Fig.2E from the same whisker can be fitted simultaneously using the Euler-Bernoulli beam model of Eq.1 with just a Young's modulus as a single adjustable parameter. The best fit for all 49 datapoints (Levenberg-Marquardt) yields Young's modulus of 3.9583 GPa with standard error (SE) of 0.0029 and Pearson correlation coefficient  $r_p=0.9989$  with p-value  $P<10^{-66}$ . Similar data measured with the B1 rat whisker is shown in Fig.2G with the best fit to all 107 datapoints yielding Young's modulus of 1.7340 GPa with 0.0042 SE (Pearson's  $r_p=0.9890$ ,  $P<10^{-89}$ ). Both of these numbers are within the previously reported ranges for rats [25] and mice whiskers [45]. However, as opposed to previous reports where fitting was applied to fundamental or just few higher order modes, here it is done for all the modes and for all the truncations simultaneously potentially yielding better estimates.

Same data (experimental natural frequencies and the best single parameter fit to Eq.1) are replotted in Fig.2F (C1 mouse whisker) and Fig.2H (B1 rat whisker) on a semi-log plots to illustrate dependence of each mode natural frequency on the whisker length. Note, that the fundamental mode natural frequency is almost invariant to changes in the whisker length up to 10-15%. Higher order modes, however, depend strongly on the whisker length and truncation.

When the whisker is trimmed below 60% of the total arc length, its mechanical properties might change due to potential variation of Young's modulus along the whisker length [48], contribution of the central medulla to variation of density [25], or deviation of a whisker taper from the ideal conical shape [46]. While all these potential contributions could not be ruled out, however, the best fit to the data that assumes a linear truncation, a constant density, and a constant Young's modulus, indicate that these contributions are relatively small.

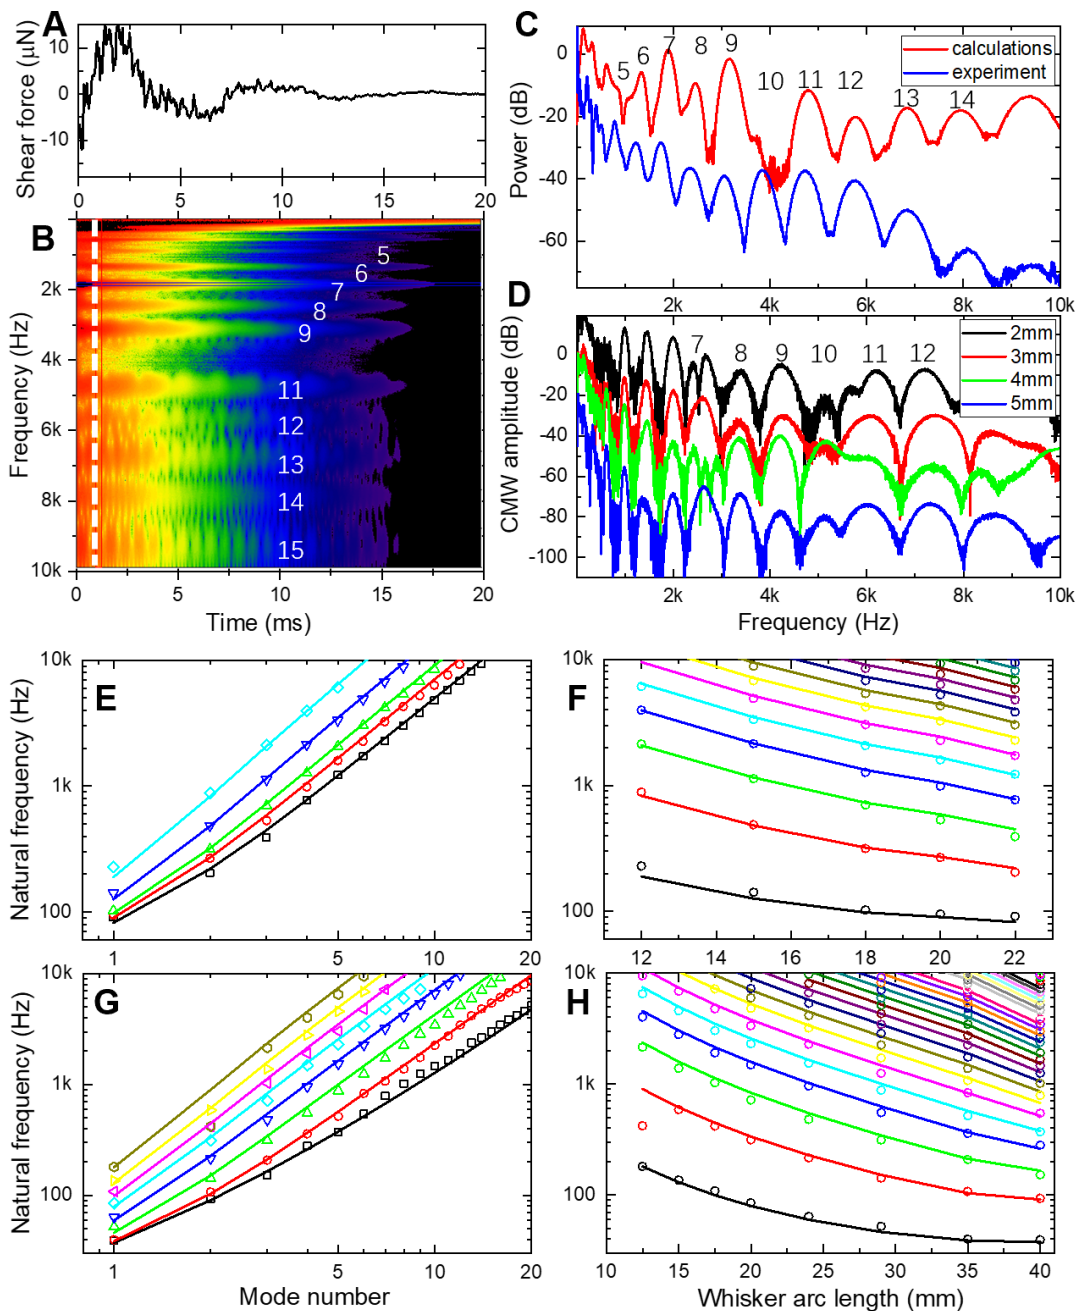

**Figure 2. Vibrational bands are Euler-Bernoulli transverse vibrational eigenmodes.**

(A) Shear force at the whisker base calculated for a truncated whisker with the arc length 29mm, radii at the base  $60\mu\text{m}$  and at the tip  $17\mu\text{m}$ , density  $1000\text{kg/m}^3$ , Young's modulus  $2\text{GPa}$ , damping coefficient  $\alpha = 430\text{ rad/s}$ . Whisker is touching the pole at 2mm from the tip. (B) Complex Morlet wavelet transformation spectrogram of the voltage trace in A). Color scheme represents the transform absolute magnitude in a logarithmic scale. Vibrational modes are numbered starting from the fundamental mode. (C) Normalized spectrum of the calculated wavelet transform (red) taken at 1ms time delay from the slip-off in A), compared to normalized experimental power spectrum (blue) of B1 rat whisker trimmed to 29mm from Fig.1D,E,F. Corresponding transverse vibrational modes are numbered starting from the fundamental mode. (D) Series of calculated wavelet transform spectra for different position of the pole relative to the tip of the whisker (2, 3, 4, and 5mm from the tip). Whisker parameters are the same as in A). (E) Log-log plot of modes natural frequencies for the C1 mouse whisker with the original total arc length of 21.5mm that is consecutively trimmed down to 12mm. (F) Same results as in F), replotted in semi-log plot as natural frequencies for different modes as a function of a whisker length. (G) Log-log plot of modes natural frequencies for the B1 rat whiskers with original total arc length of 40mm trimmed consecutively down to 12.5mm. (H) Same results as in G) but replotted in semi-log plot as natural frequencies for different modes as a function of a whisker length.

## Modal damping is frequency dependent

Once the whisker is slipping off the pole and is freely vibrating in air, the vibrational modes are decaying in time due to various energy dissipation channels including dissipation within the whisker, damping in the follicle, and friction in the air. Historically, damping ratios  $\zeta$  were evaluated experimentally from the analysis of fast videography and were found to be lying within a narrow range of 0.1-0.2 for both the fundamental vibrational mode [31, 32, 45] and for the first few higher order modes [44]. Therefore, a linear damping model with a frequency-independent damping ratio is typically considered [43, 45]. Same assumption of frequency-independent damping is used for the calculations in Fig.2, which explains the identical temporal decay of each of vibrational bands in Fig.2B (the temporal extent of each band tails from 0ms to 15ms). This assumption on frequency independent damping, while convenient, is, however, unphysical as it violates causality [49].

In a striking contrast to this model, the experimental spectrogram of Fig.1B (and Fig.1E) exhibits increasingly fast time decay of the wavelet amplitude for larger mode numbers (higher frequencies). This indicates a strong frequency dispersion of damping. Figure 3A represents a set of temporal cross-sections of the CMW spectrogram of Fig.1B taken at the central frequencies of the fundamental and higher order vibrational modes. All of them show exponential temporal decay spanning 30-40dB in amplitude with a slope rapidly increasing with the mode number. The damping ratio  $\zeta$  extracted (Materials and Methods) from the decay time constant of the wavelet temporal cross-section (for higher order modes above 200Hz) and from the damped sinusoid fitting of the FFT bandpass filtered voltage traces (for modes below 200Hz) is shown in Fig.3B (black circles, total arc length 21.5mm) and indicate that while the fundamental mode damping ratio is around  $\zeta = 0.3$ , the high frequency modes are significantly under-damped with a damping ratio that is 100X smaller. The dependence is roughly linear in a log-log scale indicating the inverse dependence of the damping ratio with frequency. Moreover, similar trend is observed for the same whisker that is consecutively trimmed to increasingly shorter arc lengths (Fig.3B). These observations indicate that, as in the case of natural frequencies, possible contributions of nonuniformity in whisker mechanical properties (tapering, Young's modulus, density, etc.) to damping is relatively small. Analogous inverse frequency dependence is observed also for the rat B1 whisker trimmed to 29mm arc length (Fig.3C, D) indicating similar damping mechanisms.

In the presence of damping the natural frequencies are becoming complex that, for lightly damped structures, can be expressed in terms of undamped natural frequencies and modal Q-factors. Modal Q-factors for both, the C1 mouse (black circles) and the B1 rat (red triangles) whisker, are presented in Fig.3E. To identify various types of damping (locally vs non-locally reacting, non-viscous vs viscous), we used a simple method that has been proposed for identification of various types of damping matrix [50, 51]. It is based on evaluation of a parameter  $\gamma$  that is a fraction of a characteristic relaxation time of the modal damping function compared with the natural periods of the vibration. When  $\gamma$  is small the damping behavior is expected to be essentially viscous, but when  $\gamma$  is close to unity non-viscous effects should become significant. Solid and dashed lines in Fig.3E represent theoretical modal Q-factors for different  $\gamma$  values taken from Fig.5-6 of [51] (Fig.5-12, and Fig.5-13 of [50]) for an exponential relaxation function.

Comparison with the non-locally reacting damping models (dashed lines in Fig.3E) and with locally reacting (solid lines) the experimental data support local damping models. While mouse whisker damping is very close to being viscous ( $\zeta=0.02$ ), the rat whisker damping matrix has potential contribution of non-viscous asymmetric terms ( $\zeta=0.5$ ).

## Modal group velocity is frequency dependent

When the shockwave is generated by a rapid application of a force to a whisker during interaction with the object, it does not reach the whisker base immediately but propagates with a finite speed. The shockwave speed has been measured [44] and calculated [45] to be of the order of 5-10m/s that provides a few ms delay for the vibrational energy to reach the follicle [52]. However, as it follows from previous

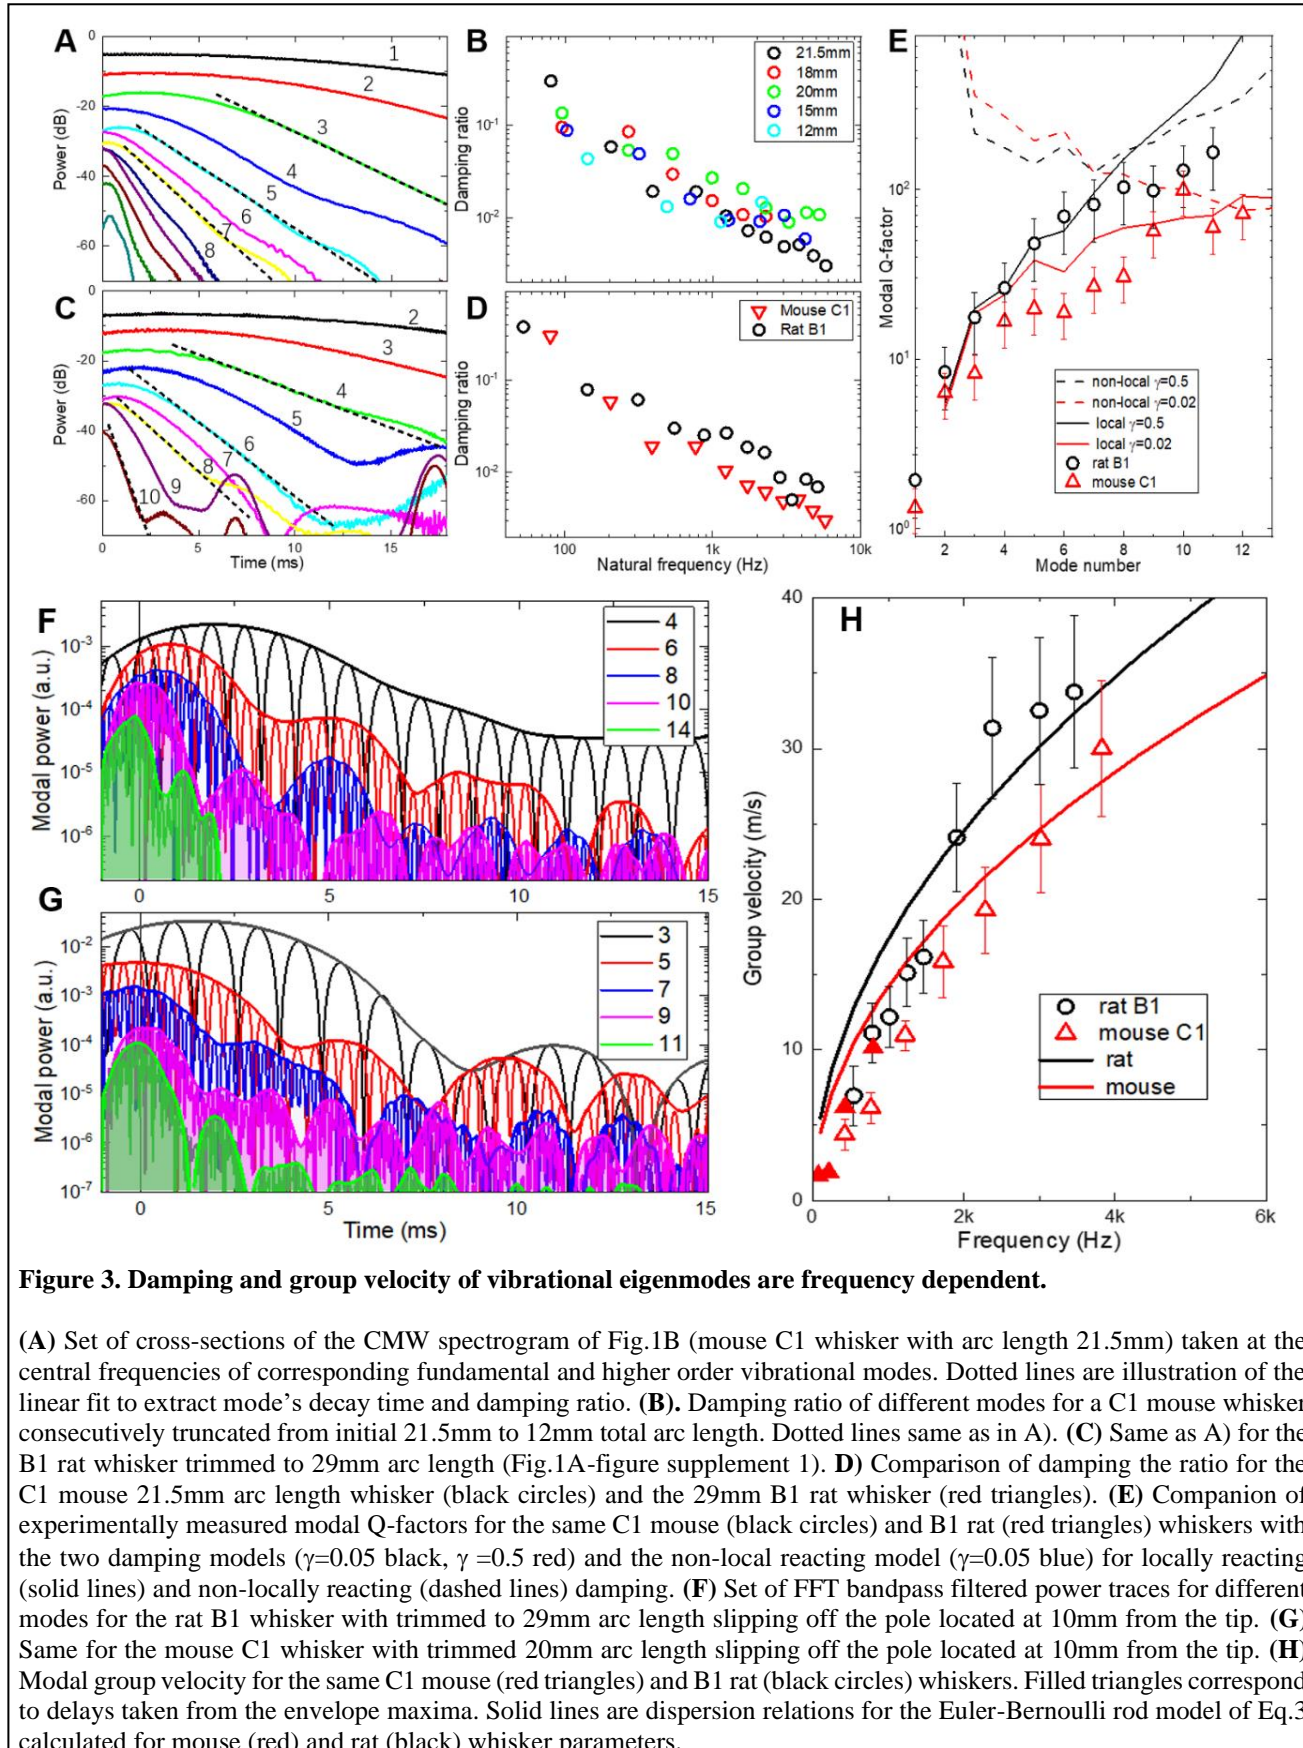



sections, the shockwave is a superposition of multiple eigenmodes with their energy distribution dependent on where and how fast the force is applied to the whisker [45]. Since eigenmodes in a truncated conical beam interacting with a pole remain mutually orthogonal [45] even in the presence of viscous or non-viscous damping [50, 51], the power of each eigenmode  $U_j(t)$  is evolving independently over time:

$$U(t) = \sum_j U_j(t) \quad \text{Eq.2}$$

Not only are the energies of the eigenmodes different, but also are their phase and group velocities as well, since, in general, the transverse waves (as opposed to longitudinal or torsional waves) are dispersive [53]. The frequency dispersion (dependence of the wavenumber  $k$  on frequency  $\omega$ ) of the transverse wave propagating in an infinite Euler-Bernoulli rod with a constant radius  $R$  is:

$$k = \omega^{1/2} \left( \frac{4\rho}{ER^2} \right)^{1/4} \quad \text{Eq.3}$$

Voltage traces of Fig.1A (Fig.1D) show that higher frequency components dominate at short arrival times below 5ms while low frequency components dominate at a later time indicating normal frequency dispersion in Eq.3. Spectral analysis based on FFT bandpass-filtering (see SM Fig.S5) is shown in Fig.3F,G for several higher order eigenmodes for the 29mm trimmed B1 rat (Fig.3F) and the trimmed 20mm C1 mouse whisker (Fig.3G). The maxima of the power envelopes of the lower order modes in Fig.3F,G are delayed by a few ms with respect to maxima of the higher order modes indicating group velocity dispersion (as is also the case of Fig.3A,C, and Fig.S5B). Group velocity calculated from the arrival time of the envelop maxima for a C1 whisker is plotted in Fig.3H (solid red triangles) showing group velocity of 1.7m/s for the fundamental mode (74Hz) increasing to 10m/s for the 4<sup>th</sup> mode (800Hz) (see also Fig.S5D).

Besides the apparent delay of the envelope maxima, a periodic modulation of the envelope amplitude is sometimes observed as shown in Fig.3F,G (also visible in Fig.3C). The beating period of these oscillations is decreasing with the increase of the mode number from over 5ms for lower order modes (modes 5 and 6 in Figs.5F and 5G) to less than 1ms for higher frequency modes (modes 11 and 14 in Figs.5F and 5G). We hypothesize that this periodic modulation is the result of the modes wave packets bouncing back and forth along the whisker length due to reflections at the whisker base and at the tip. Indeed, power reflection coefficient at the whisker tip can be estimated as large as 99% assuming ultrasound acoustic impedances of air  $Z_a$  as  $4 \times 10^2$  Rayl and of a keratin whisker  $Z_w$  about  $1.7 \times 10^6$  Rayl. For a whisker base located in-vivo inside the collagenous follicle [26] the reflection is almost negligible, enabling efficient uptake of vibrational energy. However, with a whisker glued to an aluminum microphone with  $Z_m$  about  $14 \times 10^6$  Rayl the power reflection coefficient exceeds 99% for frequencies of interest.

Fig.3H represents the group velocity dispersion for both rat (black circles) and mouse (red open triangles) whiskers. Solid lines in Fig.3H show group velocity calculated using Eq.3 model with the Young's moduli for the rat (black) and the mouse (red) whiskers determined from Fig.2H fits. Even though the model assumes a non-tapered cylindrical whisker, the overall trend and the magnitude of the group velocities are well reproduced.

Therefore, not only are higher order modes less damped, but they also propagate at much faster group velocity of 20-30m/s.

### High order modes carry up to 80% of the shockwave vibrational energy

Interaction of a whisker with an isolated pole considered above is a relatively rare situation for rodents navigating in natural environment. To study much richer repertoire of whisker micromotions related to the natural stimuli, additional experiments were performed using the same experimental setup, but with a pole replaced by a sandpaper of different grit numbers (Fig.S4 and SM Movie.2). Figure 4 represents typical voltage traces and CMW spectrograms for the same B1 rat (Fig.4A,B) and the C1 mouse (Fig.4D,E) whiskers. As in the case of slipping- off the pole of Fig.1 discussed above, the freely

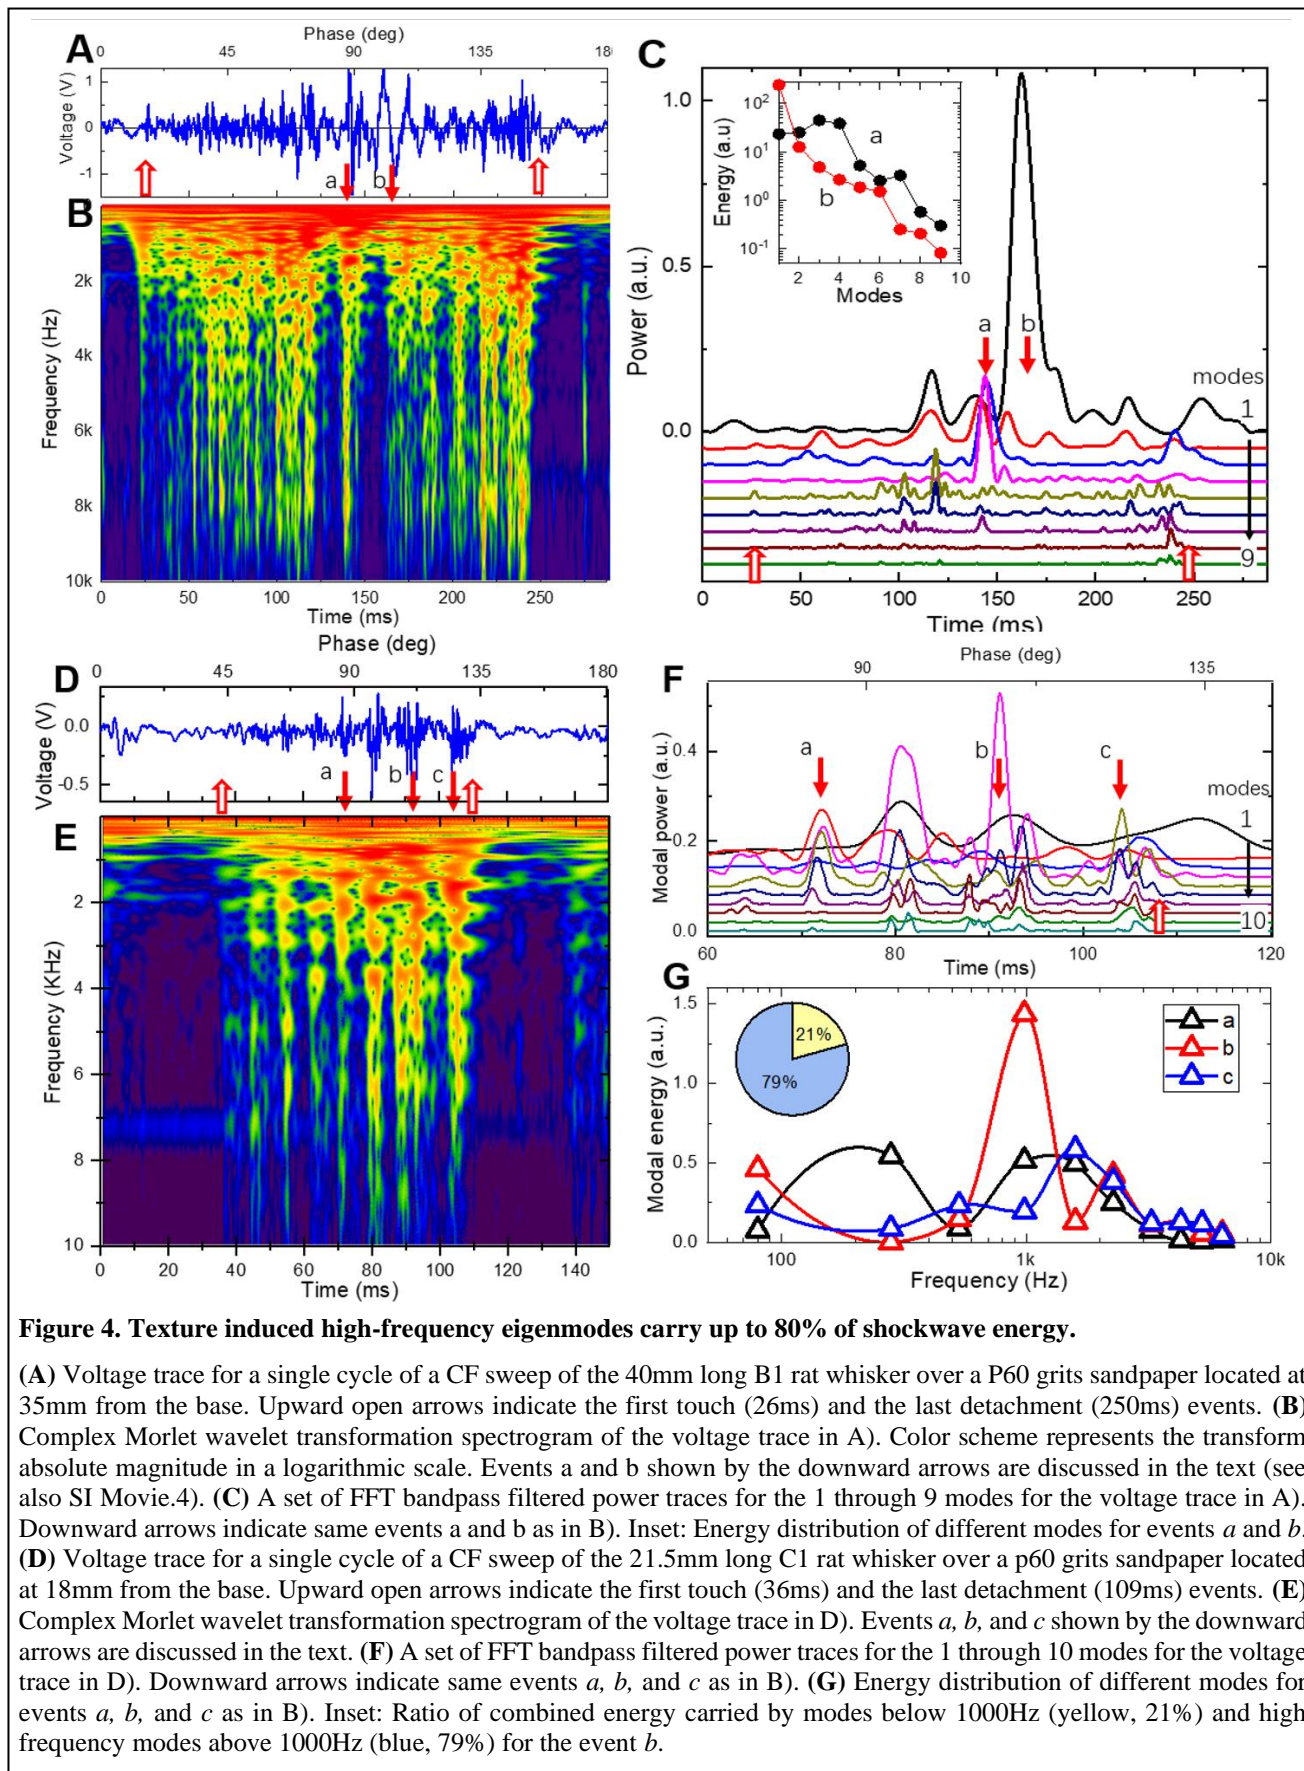

vibrating eigenmodes are also observed when the whisker is released from the sandpaper (upward arrow at 250ms in Fig.4B and at 109ms in Fig.4E) with frequencies consistent with the total arc length. Transient short-lived vertical streaks in the CWM spectrograms are observed, representing fast events during whisker swiping across the textured surface that generate energetic shockwaves with prominent high frequency components. The frequency spectrum (vertical cross-section of a CMW spectrogram) of each streak shows a series of vibrational bands with central frequencies almost constant for all events (note horizontal clustering of bands in Fig.4B and Fig.4E). When compared to frequencies of the freely vibrating whisker, the modal frequencies of the streaks are consistent with the whisker arc length shorter by 2-3mm corresponding to the portion of the whisker tip attached to the surface during sweeping. Naturally, such streaks can be associated with shockwaves induced by “stick-slip” whisker motions believed to be processed by primary afferents and upstream cortico-thalamic circuits to produce texture sensation [34-40]. While each streak is accompanied by fast whisker tip acceleration (discussed in detail below), however each streak event is very unique. Spectral power analysis in Fig.4C shows that the power distribution between different eigenmodes differ substantially between different vibrational events. For example, while during the event at 145ms (event *a*) the power of the modes 3 and 4 are much higher than that of the fundamental mode, the event at 160ms (event *b*) shows most its power in the fundamental mode. Modal energy (Inset in Fig.4C) calculated for 5ms integration window (Materials and Methods) shows fast exponential decay for event *b* resembling pole-induced free vibration case (Fig.S3E). In contrast, during the event *a*, the modes 3 and 4 are over 10X more energetic than the fundamental. Remarkably, the redistribution of energies between fundamental and the higher order modes occurs within just 15ms time interval between the two events.

Similar spectral power analysis for the mouse whisker (Fig.4F) reveals even more striking observation that not only the power of the fundamental mode is relatively small (events *b*, *c*) or even virtually negligible (event *a*), but also the power is quickly redistributed between different modes. The modal energy analysis (Fig.4G) shows that for most of the events the fundamental and the first two higher order modes combined carry together only around 20% of the total vibrational energy (inset in Fig.4G) while modes at frequencies beyond 1000Hz take up to 80% of the shockwave energy.

The analysis above reveals that each shockwave event is characterized by a unique distribution of energies between different modes as expected from Eq.2. Comparison of CWM spectrograms for several nominally identical CF swipes (SM Movie 4) indicate that, while on average the distribution between swipes is similar, however unique events (e.g. event *a* in Fig.4A) are characteristic of a specific trajectory of a whisker tip over specific bumps and troughs of the textured surface. Moreover, in striking difference to interaction with the pole, for some of the events the vast majority of the shockwave energy is redirected to higher order modes at frequencies beyond 500Hz, well above frequencies typically studied with fast videography.

### High order modes are generated during high-speed collision

Although whisker interactions with a textured surface are much closer to interactions in the natural environment than swiping off the pole, however their complexity hinders detailed analysis. To get deeper insight, a set of experiments was performed with a whisker swiping against an aluminum grating with periodically spaced grooves (Materials and Methods). Fig.5A shows whisker shapes extracted from a postprocessed (Materials and Methods) high-speed movie recorded at 1460fps during a 109ms-long single swipe of a mouse C2 whisker with 24.1mm arc length over three neighboring teeth of the grating (SM Movie 4). Interaction with each of a grating tooth (events 1, 2, and 3 in Fig.5A) can be divided into three consecutive phases: “pinned”, “unpinned” and “collision”. First, the “pinned” or “stick” phase, is characterized by a whisker tip movement slower than the angular scan velocity (note crowding of whisker traces in the beginning of each event in Fig.5A). Once “stuck”, the whisker curvature  $\kappa_p$  gradually increases (Fig.5B) until the second “unpinned” or “slip” phase follows when the whisker tip is released from the tooth edge with large acceleration (up to  $2 \times 10^6$  deg/s in Fig.5C) and a sudden drop

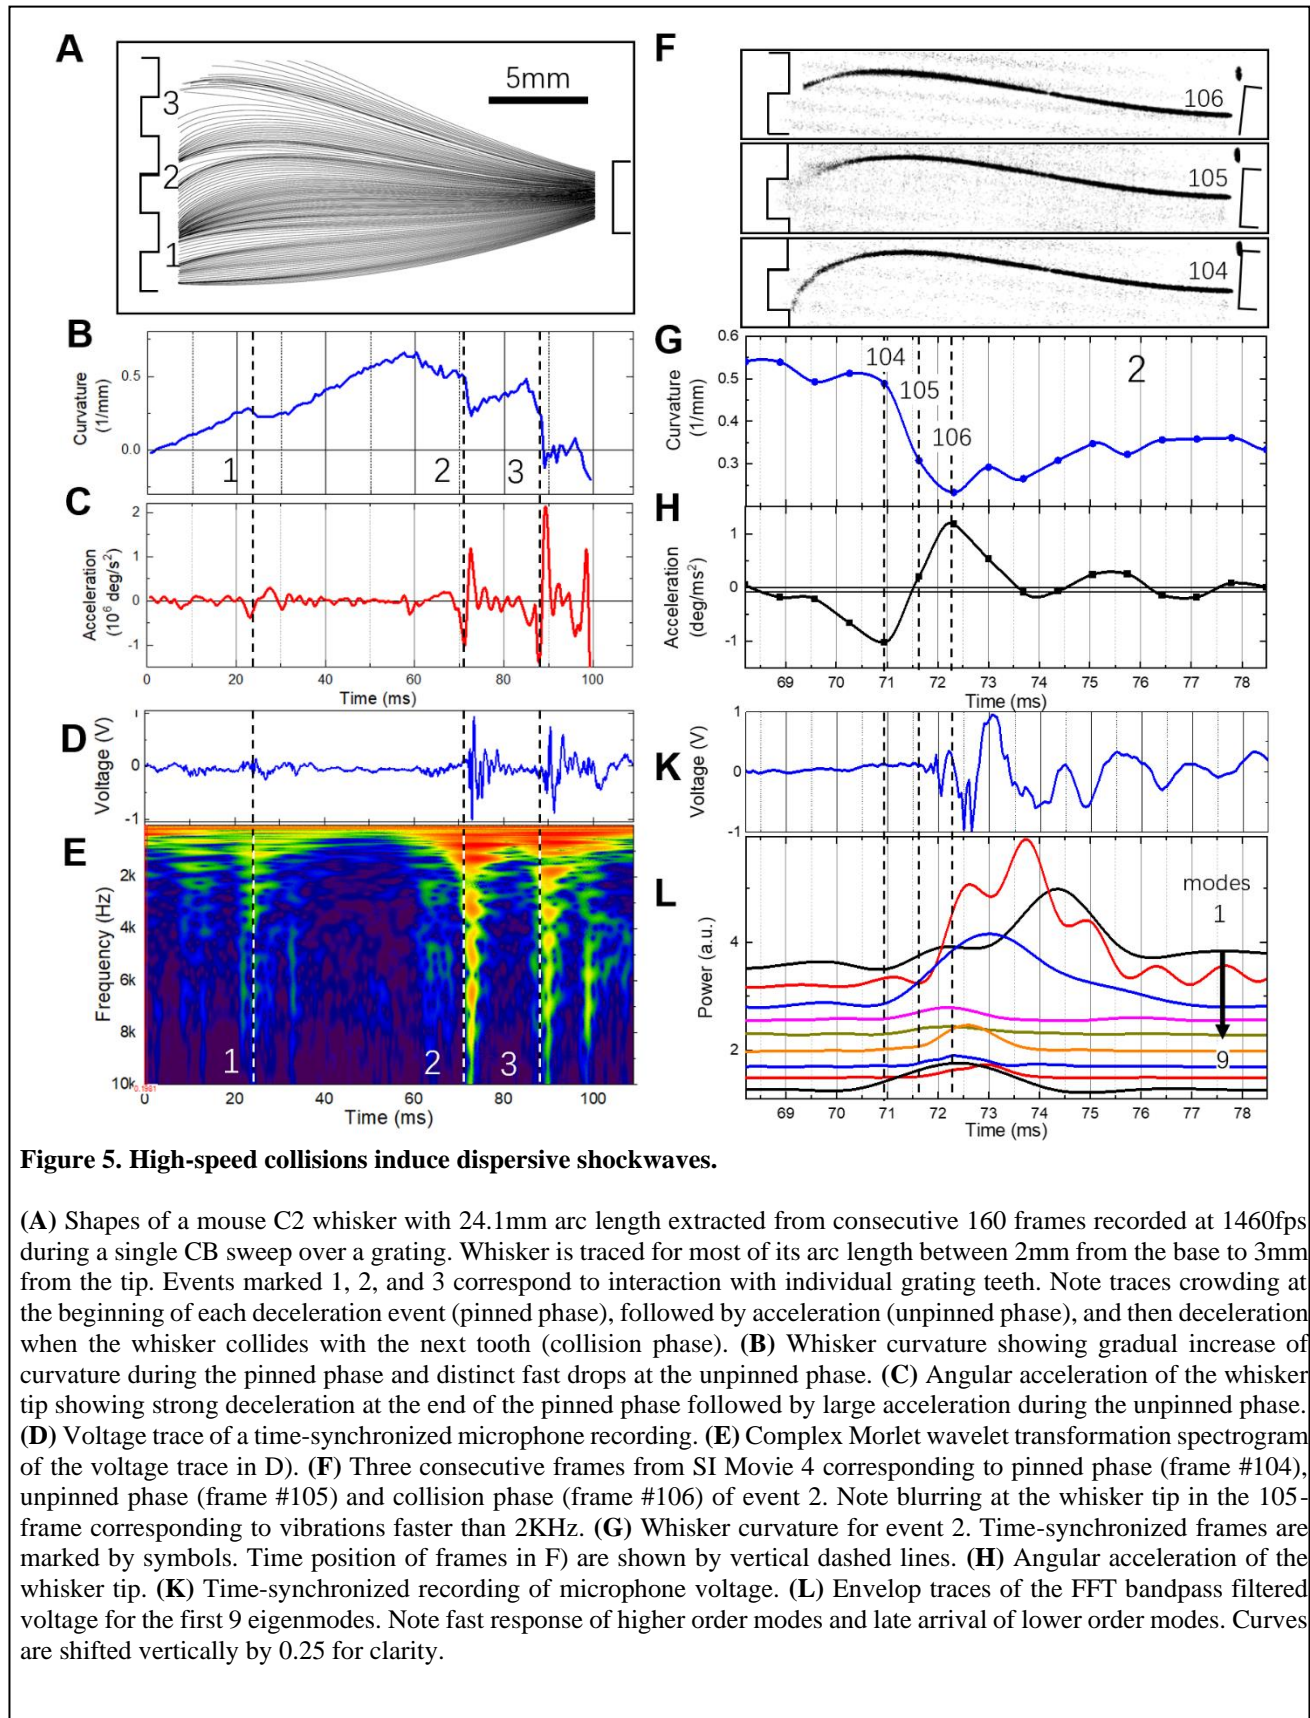

in curvature (Fig.5B). These pinned and unpinned phases are similar to a slip-off event observed during interaction with a pole in Figs.1-3 as both excite mostly lower order vibrations. The third “collision” phase is unique for the interaction with a grating (and with textured surfaces of Fig.4) as it represents the moment when the whisker tip at high velocity is colliding with the edge of a next grating tooth (next obstacle on a textured surface). This is accompanied by a sudden termination of the curvature drop (Fig.5B), abrupt deceleration (Fig.5C), and appearance of large amplitude voltage transients in the vibrational power trace (Fig.5D) as well as excitation of high frequency eigenmodes (Fig.5E). Image of the frame #104 in Fig.5F corresponds to the end of the pinned phase characterized by a maximum curvature (Fig.5G) and largest deceleration (Fig.5H) indicating increase of a force applied to a whisker tip (hence increase of the stored elastic strain potential energy). This is followed by the frame #105 in Fig.5F that shows sudden whisker release (unpinned phase) when the force becomes large enough to overcome the static friction. This is accompanied by a sudden drop in whisker curvature (Fig.5G) with an offset indicative of an amount of kinetic energy released. Fast whisker vibrations corresponding to frequencies beyond 2000Hz show up as blurring at the whisker tip. Shockwave arrival time of eigenmodes of different frequencies at the whisker base (Fig.5E) is consistent with the arc length from the base to the contact of 21mm (24.1mm total arc length minus 3mm protruding inside the groove). Therefore, even in the unpinned phase, the whisker tip is not vibrating freely, but is scratching the bottom of the grating groove. The very next frame #106 corresponds to a whisker tip collision with the edge of the next tooth, the end of a sudden curvature drop (Fig.5G), and the start of deceleration (Fig.5H). That corresponds to a “collision” phase when the kinetic energy of a moving whisker is converted into an energetic shockwave that starts to propagate along the whisker towards its base. Time synchronized voltage trace (Fig.5K) shows that first signals appear at the whisker base at 71.7ms time (in-between frames #105 and #106). Spectral mode analysis of the voltage trace in Fig.5L reveals that, as in the case of interaction with a texture in Fig.4, the shockwave energy is efficiently converted to higher order modes. Note, that as in the case of interaction with the pole in Fig.S5C, the power of a second order mode (34% of total energy at 200Hz) exceeds the power of the fundamental mode (20% of total energy at 87Hz) consistent with prior observations [52]. However, as opposed to interaction with the pole and consistent with observations of Fig.4 for a textured surface, the higher order modes carry substantial portion of a shockwave energy (i.e., 10% of total energy in the mode #9 at 3800Hz). These higher order modes arrive at the whisker base first, while the lower order modes are significantly delayed (e.g. fundamental mode #1 is delayed by 3ms) consistent with the group velocity dispersion of Fig.3H.

## DISCUSSION

### Whisker is a dispersive pre-neuronal processor

Results discussed above demonstrate that a whisker encounters a series of a 3-phase pinned-unpinned-collision events while interacting with the object (Fig.6A). The elastic energy stored in the whisker bending during the pinned phase is transformed into kinetic energy of whisker movement during the unpinned phase. Whisker acceleration during pinned-unpinned phases is not enough to generate energetic high frequency modes above 500Hz. It is the whisker’s high-speed collision with an obstacle that converts the kinetic energy accumulated during pinned-unpinned phases into a vibrational shockwave. The shockwave is segregated into wave packets of individual vibrational eigenmodes (Fig.1 and Fig.2). The larger the kinetic energy (faster velocity) and the shorter the collision time, the broader is the frequency power spectrum of a shockwave and the more efficient is the excitation of higher order modes [45]. Their excitation is, therefore, inefficient during slipping off the pole (less than 3% of shockwave energy, FigS3), but start to show up during interaction with a grating (up to 30% of shockwave energy, Fig.5), and they can dominate in some of the events during interaction with a textured surface (up to 80% of shockwave energy, Fig.4). Being mostly orthogonal (Eq.2) even in the

presence of damping, these modes are not exchanging energies while propagating. Instead, due to a modal dispersion of damping (Fig.3E) and of group velocity (Fig.3H), the shockwave, therefore, while propagating along the whisker, disperses with individual wave packets arriving at the base at different times and with different attenuation. Higher frequency modes above 500Hz (red oscillatory packet in Fig.6A) being fast and less damped arrive first, while slow and heavily damped low frequency modes (blue oscillatory packet in Fig.6A) are significantly delayed. A single collision event, therefore, is transformed into a time series of individual events at the whisker base as the eigenmode wave packets arrive.

This hypothesis of *dispersive vibrational transduction* (DVT) implies that whisker micromotions faster than 500Hz are responsible for *frequency-to-time* transformation of tactile signals and their fast conveyance for subsequent uptake in the neural system.

### **Dispersive pre-neuronal processing is biologically plausible**

Frequency dispersion used to pre-process sensory inputs prior to encoding into a spike train is a common evolutionary strategy for sensory signals intake that enables repurposing generic neural transduction organs that are otherwise frequency insensitive. For example, biomechanical tonotopy along the hearing organ having a graded mass and stiffness along the traveling wave propagation direction provides frequency-to-place transformation of sound [54] and induce opening of mechanosensitive membrane channels [55] that otherwise are insensitive to frequency. Similarly, glabrous skin vibrations with frequencies up to 800Hz while propagating along the finger skin in primates exhibit strong frequency dispersion of decay rate and propagation speed [56], that induce precisely time-aligned spike trains in primary afferents [57]. The DVT hypothesis implies that a whisker is such a dispersive pre-neuronal organ that converts multiple high-frequency eigenmodes excited at the whisker tip during collision, into a time series of vibrational energy bursts arriving at the whisker follicle at different times (Fig.6A).

It is generally assumed that the mechanosensitive ion channels [55] are gated (Fig.6B) by the stimulus force directly (hence with ultrasmall latencies), and, if the membrane potential exceeds the threshold, generate spikes (Fig.6C). Rapidly adapting mechanoreceptors (RA) (i.e. low threshold longitudinal Lanceolate endings [58]) are of a particular interest as their spiking is activated by a rapid ramp (whisker angular velocities at least 500°/s [19]) of mechanical stimulation and their impulse numbers (spikes per stimulus ramp) are very low, close to just a single spike [59] (Fig.6C). Therefore, RA mechanoreceptors are particularly suitable candidates for detecting higher order eigenmode's wave packets associated with whisker angular velocities up to 5000°/s (Fig.5C).

Tracking elastic strain potential energy in the pinned phase, its conversion into kinetic energy during the unpinned phase, and the final transformation into vibrational energy at the collision (Materials and Methods) gives an estimate for higher order mode#9 at 3800Hz in Fig.5L delivering about 160nJ to the follicle. It is a hefty 14 orders of magnitude higher than possible sensitivity limit of mechanoreceptors (e.g.  $10^{-21}$ J has been reported [60]). Primary afferents in rodents TG are also known to produce precisely temporally aligned spikes with exceptionally small jitter of just 10 $\mu$ s [40]. It is plausible, therefore, that the arrival of individual wave packets of higher order modes to the follicle may be detected by RA.

### **High order modes contribute to neural encoding of haptic cues**

Following the formulation of the DVT hypothesis a simple spike encoding model is proposed in Fig.6D-H. It is assumed that the RA mechanoreceptors generate a single spike when the vibrational energy at the whisker base crosses some threshold power level (both up and down crossings in Fig.6C). For a moderate threshold of 5% the spike train consists of 20 spikes (Fig.6E) with dense sub-ms inter-spike interval (ISI) within the first 1ms after the collision followed by a sparse spiking for longer times. Since there are several hundreds of RA in a single follicle, we can neglect the dead time for spike encoding across the population due to refractory period. Each collision event, therefore, generates a unique sequence of timed spikes for the RA population (Fig.6E). Since the power temporal profiles are highly

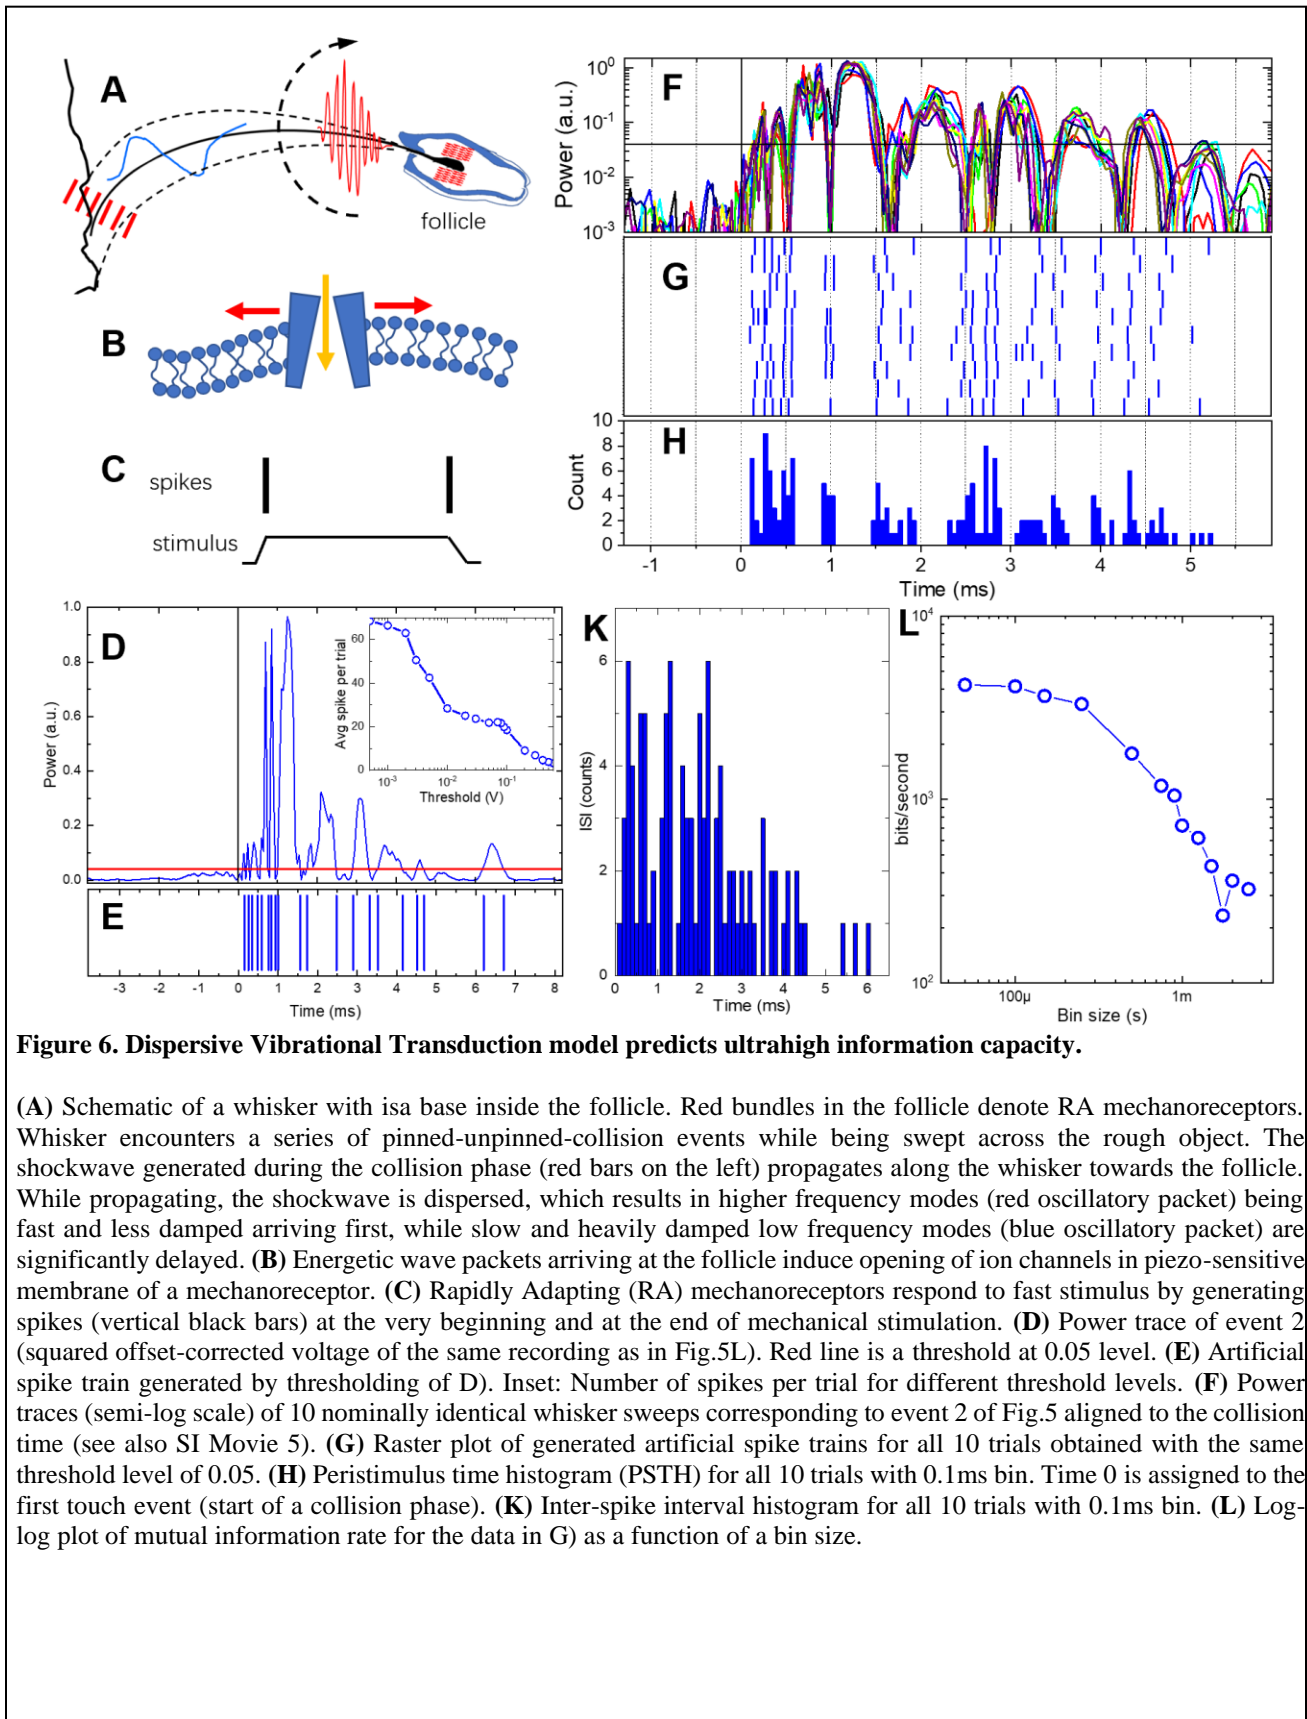

reproducible for repetitive collision events (Fig.6F, see also SM Movies 1,2, and 5), so are the spike “bar codes” shown in a spike raster plot of Fig.6G for 10 separate whisker sweeps for the same event#2. The resulting peristimulus time histogram (PSTH) in Fig.6H shows distinct well-separated sharp peaks with less than 100 $\mu$ s jitter for each individual peak. While the simple thresholding method produces deterministic spikes, the ISI diagram of Fig.6K shows the presence of some uncertainty mostly determined by trial-to-trial variability of power traces (variability of whisker sweep trajectories resulting in a variability of eigenmode excitation and, therefore, wave packet arrivals).

The number of generated spikes can be tuned by changing a threshold (inset in Fig.6D). Decreasing the thresholding level below 10% results first in a plateau of 20-25 spikes per single collision event (inset In Fig.6D) and then in fast increase of a spike rate to above 50 when the threshold is below the background level. Biologically, the threshold tunability can potentially be provided by cortico-thalamic feedback or by adjustment of the impedance mismatch via regulation of a follicle blood flow [13].

While the DVT hypothesis considers whisker vibrations, it provides a coding model that is much simpler and with less parameters (Fig.6A-E) than the whisker resonance model [32, 33]. The latter considers the lowest frequency fundamental mode as a sensory input for spike encoding that can be decoded upstream by the cortico-thalamic phase-locked loops [61, 62] for texture discrimination. However, as demonstrated above, the fundamental mode is strongly damped (Fig.3B,D), its frequency is much less affected by the whisker length (Fig.2F,H) than by contact mechanics [47], it carries just a fraction of a vibrational energy for both, pole (Fig.S5C, see also [52]), and for texture (Fig.4C,G) interactions, and its wavepacket arrives to the follicle the latest with several ms delay. Importantly, the vibrational model would require signals from a number of whiskers to be integrated to provide robust texture discrimination, while experimental results demonstrate that a single whisker is sufficient [63].

The DVT hypothesis is consistent with most if not all experimental findings related to verifying the “stick-slip” hypothesis [22, 34-38]. Various coding schemes have been proposed for interpretation of reverse correlation studies [14, 16, 17] of stick-slip induced neural activity including fast variation of whisker curvature [21, 24], of angular velocity [21, 35, 37], associated angular acceleration peaks [17, 34], rotational forces [17], or more complex multiplexed products of kinematic and mechanical variables [64, 65]. The DVT hypothesis implies that all these variables do not form an independent basis in a multi-dimensional textural feature space, but rather they all are dependent variables of the same process that generates higher-order modes: conversion of elastic strain energy stored in a whisker bending that is released into a kinetic energy of angular whisker acceleration and transformed into high-frequency modal vibrations at collision (Fig.6). As opposed to stick-slip interpretation that considers a spike rate coding of whisker kinematic and mechanical variables averaged over the time of the trial, the DVT hypothesis implies a unique temporal “bar code” that enables texture discrimination not only with a single whisker in a single sweep, but potentially during just a single collision event.

### **Information capacity delivered by higher order modes is in Kb/sec range**

To evaluate an upper level of information capacity available at the whisker follicle for the neural uptake after a single collision event, information theoretic methods were employed [66, 67] (see Materials and Methods). Spike train for each trial was transformed into a binary sequence of 1 (if the spike is present within a given time bin) and 0 (if the spike is absent). Following the Direct Method (DM) [66], the Shannon total entropy was determined [67] by Eq.8 and noise entropy given the vibrational signal as stimulus was estimated using Eq.9 in Materials and Methods. The mutual information (Fig.6L) was then determined by Eq.10 (Materials and Methods) as the difference between the total entropy and the noise entropy and is measured in units of bits/sec. For 1ms bin time the mutual information available for spike encoding at the whisker base is 720bits/sec, which is consistent with estimates based on recorded spikes in primary afferents in a somatosensory system (up to 500bits/sec in rodent’s TG [20]) and in auditory system (up to 370bits/sec [68]). However, when shorter time intervals are considered (time bin size



decreased to 200 $\mu$ s), the mutual information is increasing dramatically up to 3000bits/sec (Fig.6L). Further decrease of the bin size down to 50 $\mu$ s sampling limit shows a plateau at around 4000bits/sec. This estimate is indicative of an ultrahigh information capacity that is available for encoding in primary afferents that is at least 10-fold higher than what is usually perceived.

As the spike transduction model above is based on simple thresholding and therefore is deterministic, this estimate does not consider inevitable fluctuations in spike encoding due to stochastic ion channel activation in mechanoreceptors. Hence, the DM estimate provides an upper bound for the mutual information rate. The DM method is, however, based on assumption that spikes in different bins are not correlated and variance of trial-averaged spiking is assigned to channel noise. However, the temporal “bar code” is unique (Fig.6E) and highly repetitive for a given collision (i.e., event *a* in Fig.4A-C and in SM Movie.2) that provides unique information on individual collision event in a single trial. Texture discrimination then can potentially be done during a single sweep in a single trial without the need for trial-to-trial averaging. In this case the information capacity can be estimated as a number of distinguishable bits in a unique bar-coded word. Assuming the “bar code” length of a few ms (Fig.6F) and 100 $\mu$ s spike jitter (Fig.6H), the information capacity can potentially be boosted up to tens of Kbit/sec.

It has been cautioned that generating spikes with high temporal accuracy is metabolically expensive [69, 70], however the DVT hypothesis implies that time coding is needed for just a few ms immediately following the collision event. During this time higher order eigenmodes excited by the most energetic high-speed collision events arrive at the follicle with high group velocity (30-40m/s as in Fig.3H), transduced in RA with short latency into precisely timed spike trains (Fig.6E), which are routed to thalamo-cortical circuits via myelinated afferent fibers at matching conduction speeds (10-30m/s [58, 59]) ensuring overall ultrasmall latency of sensory uptake. In this scheme the signaling metabolic cost of generating high-bandwidth signals is large while the fixed cost of keeping a signaling system in a state of readiness (that dominates the total cost [70]) is low as it is required only for short bursts of activity. Such coding scheme resembles burst-mode optical communications that is considered for large scale datacenters to provide energy-efficient high-bandwidth messaging during short time bursts when circuits are powered up [71]. Later vibrational events at the whisker follicle defined by arrival of lower order modes can be detected using sparse rate coding that is slower and less metabolically expensive. The overall sensory intake is multiplexed, therefore, between these slow rate-coded channels and the ultrafast time-coded channels [19, 62, 65].

## MATERIALS AND METHODS

### Materials

**Whiskers harvesting.** We used full grown whiskers from 2 male adult C57BL/6J mice (P56, 30g weight) and a Sprague Dawley male adult rat (P100, 350g weight). Whiskers were plucked from a mystacial pad keeping follicles intact while animals were under anesthesia. Shapes of the whiskers were measured under light microscope at high magnification [10] to determine total arc length  $S_{tot}$ , diameter of the whisker at the base  $R_b$  and at the tip  $r_t$ , as well as intrinsic curvature (SM Table S1). Intrinsic curvature was defined as a coefficient  $A$  in the parabolic fitting  $Ax^2$  of the whisker shape [24, 41, 72]. Distal radius slope is calculated as  $Slope_R = (R_b - r_t)/S_{tot}$  [73]. For some experiments whiskers were trimmed from the distal side using a sharp razor blade. Resulting total arc length was recorded as well as the change in intrinsic curvature parameter if any.

### Experimental Design

**Whisker mounting on electret microphone.** To measure whisker vibrations during interactions with objects, the electret condenser microphone with built-in op-amp pre-amplifier (Adafruit MAX4466) was used. The covering cloth was removed from the microphone capsule and the follicle end of a whisker was attached directly to the very center of the exposed electret membrane with a nL-scale drop of a glue (Ethyl-2 Cyanoacrylate, Sigma-Aldrich). The glue covered less than  $0.02\text{mm}^2$  area of the membrane to minimize possible acoustic distortions (inset in Fig.S1A). Microscopy confirmed that when glued, the proximal base of the whisker was perpendicular to the plane of the membrane. Whisker was attached to the microphone within 24 hours, and all consecutive measurements were done within 48 hours, from the whisker harvesting, respectively. Whisker mechanical properties are believed to be stable after plucking for weeks-long time periods [25].

**Scanning system.** Microphone was positioned at the center of a rotational scanner driven by a stepper motor (6V Nema-17) through a conveyor belt to minimize motor vibrations (Fig.S1A). The gain of the microphone pre-amplifier was set at a minimal 25X to provide largest dynamic range. The output voltage from the microphone amplifier was digitized at 20kS/s at 16bits (USB-6003, National Instruments). The stepper motor was controlled by a microcontroller (Allego A3967) that was receiving driving voltages at 20kS/s generated with a 12-Bit Analog Output board (PCI-6713, National Instruments). The same driving signals were used to trigger microphone data acquisition. Using the MATLAB Data Acquisition toolbox (R2018b, Mathworks), the analog output and the analog input from the NI devices are digitized and synchronized under the same scanning rate of 20kS/s.

**High-speed videography system.** Whisker movements across various objects were simultaneously recorded in two orthogonal planes. The video in the xy plane (Fig.S1B, see also SM Movie.3 and Movie.4) was captured using the overhead 656X600 pixels camera at 1000-1500 fps (Mikrotron EoSens) equipped with a 0.36X telecentric lens that produced 25mmx23mm field-of-view (Edmund Optics, no. 58-257). Video in the yz plane (Fig.S1C) was captured using the side 659X494 pixels camera at 120 fps (Basler acA640) and a 16mm lens that produced 34mmx23mm FOV. Video streams were digitized with a frame grabber (BitFlow Axion) controlled by StreamPix7 multicamera software (NorPix). Each frame was triggered, and the time stamps were generated with less than 1ms jitter. The whole system was illuminated by an overhead LED light (Thor Labs M810L3) powered by DC power supply (Mean Well RS-15-24) and focused with 40 mm focal length aspheric condenser (Thorlabs, ACL5040U). The lossless frames were extracted from the video after experiments for further analysis. DeepLabCut [74] was used to track slow whisker movements. Fast whisker vibrations were analyzed manually on a single frame basis.

**System calibration.** The dynamic range of the system is evaluated by comparison of the background signal measured with motor movement disabled (Fig.S2A, red) and signal trace with rail-to-rail (0V-3V) span (Fig.S2A, black) measured with a C1 mouse whisker with a total arc length of 22mm swept

at 3.5Hz rate against the pole located 2mm apart from the whisker tip. Over one period of sweeping is shown with both concave forward (CF) and concave backward (CB) whisker slip-offs from the pole. The electric power calculated as  $20\log(V - V_{off})$  for both signals is shown in Fig.S2B demonstrating over 50dB dynamic range. The offset voltage  $V_{off}$  was measured separately for each trial as a mean voltage at time interval of whisker free vibrations in the air. For example, in Fig.S2A  $V_{off}=1.423V$  for time interval [0.09s-0.10s]. For all voltage traces in Figs.1-5 the voltage offset was subtracted.

The voltage traces from the microphone were calibrated using the sound and vibration analyzer (977W, Svantek). A speaker (Companion 2 series III, Bose) was used to provide a calibrated input of acoustic field of a given strength at specific frequencies. Sound waves were received by both the sound analyzer and the mounted electret microphone, both located about 50cm away from the speaker. The sound analyzer provides a dynamic analysis of the peak frequency (1/3 octave band) and its field strength in units of dB of Sound Pressure Level (SPL) as  $20\log_{10}(P/20\mu Pa)$ . The magnitude of the harmonic peak in the voltage traces  $V$  was measured in 1sec recorded clips for each frequency and field strength. Resulting calibration is presented in Fig.S2C. Calibration shows highly linear low-signal gain spanning 50dB down to the noise floor at -55dB.

**Experimental Procedure.** During the experiment, the whisker was swiped over an object (pole, grating, sandpaper) located at a fixed distance from microphone (base of the whisker). To mimic the natural whisking motion of rodents in the foveal whisking mode, the scanner was rotated forward and backward at frequencies 3-15Hz to produce 10-15 degrees amplitude sweeps [7]. Intrinsic curvature of whiskers was aligned with the direction of the xy sweeping plane. The direction of whisking was identified as concave forward (CF) and concave backward (CB) [24], consecutively, defined by the intrinsic whisker curvature.

Three types of experiments were performed: interaction with a pole, interaction with a textured surface, and interactions with a periodic grating.

**Interaction with a pole.** Fig.S3A shows voltage traces recorded during interaction of a whisker with a metal wire with 1mm diameter that was placed at varying distances from the whisker base. The characteristic short peak is identified by videography as a last physical contact of the whisker with the pole during slip off. The vibrational energy estimated as an integral under the square of the voltage trace within 30ms time range is increasing exponentially (Fig,S3B) with the pole moving closer to the whisker base. Fig.S3C shows voltage traces recorded after consecutive trimming of the whisker from the intact 21.5mm to 12mm with a constant pole position at 2mm from the whisker tip. Note the multipliers shown for corresponding traces that indicate inverse dependence of the vibrational energy on the whisker length (Fig.S3D). Note that for the 12mm trace the peak voltage exceeds the limits of the op-amp and exhibits rail-to-rail clipping.

**Interaction with a textured surface.** Fig.S4A shows a series of voltage traces recorded with the same whisker while sweeping against sandpapers with different grits roughness (p60 to p400). Signal recorded while the whisker was sweeping in the air is shown for comparison (magenta). Note characteristic peaks at 0 and 180 deg phases that correspond to changing of the sweep direction. Fig.S4B,C shows corresponding distribution and rug plots (Fig.4B) as well as FFT power spectra (Fig.4C).

**Interaction with a grating.** A custom-made aluminum grating with 2mm wide and 1mm deep slots at 4mm period was placed at various distances from the whisker base as shown in Fig.S1.

## Spectral analysis methods

**Wavelet analysis.** The well-known Fast Fourier Transform (FFT) is applicable to the frequency analysis of stationary signals. We are interested, however, in the analysis of fast changes of a signal frequency component. Wavelets provide a flexible time-frequency grid to analyze signals whose spectral content changes over time [75]. To study the frequency spectrum of whisker micromotions a

Complex Morlet Wavelet (CMW) transformation [76] was performed to capture time-varying modes including both low and high frequencies. However, due to fundamental uncertainty principle, better time resolution inevitably results in worsening of the frequency resolution [75].

To achieve balanced time-bandwidth resolution, we used CMW (MATLAB R2018b, Mathworks) with a center frequency of 3Hz (moderate time resolution) and a bandwidth coefficient of 3Hz (moderate frequency resolution). The sampling frequency from the microphone is sampled at 20kS/s, corresponding to Nyquist frequency of 10kHz. When calculating the wavelet coefficients, the frequency domain is partitioned into 5000 steps by an inversely varying scale sequence. The result is a spectrogram of wavelet coefficients with entries corresponding to different frequency components (from 2Hz to 10kHz in log scale) at each sampled time. Wavelet transforms are known to exhibit boundary effects called the cone of influence. To avoid such artifacts, the wavelet transform is performed on a larger time domain (typically 0.1 seconds longer) than the region of interest. On all CWM spectrograms the absolute value of the wavelet coefficients was plotted against time and frequency in a logarithmic scale.

**Fourier filtering analysis.** To analyze power evolution of specific modes the CMW method is not optimal as fundamental tradeoff between frequency and time resolution is varying in time and frequency domains. Instead, we used the FFT band-pass filtering applied to voltage traces to analyze how the amplitude changes with time for a single vibrational band (Origin9, Origin Labs). Based on the analysis of a CMW spectrogram (i.e., Fig.1B and Fig.1C), the entire 10kHz-wide spectrum was divided into a number of filtering bands centered around the central frequency of corresponding vibrational modes. Lower and upper cutoffs were determined by frequencies of nearby transform amplitude minima that are typically 30dB lower than the amplitude at the peak. Therefore, the bandwidth for each filtering band increases with ascending frequency. As an illustration, the band filters used for analysis of a vibrations of a C1 whisker trimmed to 20mm (red curve in Fig.1C) are shown in SM Table S2. Corresponding spectra are shown in Fig.S5A.

**Evaluation of modal power and energy.** Since our calibration results of Fig.S2C indicate high linearity of gain throughout the frequency range of interest from 60Hz to 10000Hz, we assume that the voltage induced on the electret membrane of the microphone and then amplified with op-amp is proportional to the power of acoustic waves arriving at the base of the whisker. To estimate the power carried by a particular mode  $j$ , the offset-corrected voltage traces were bandpass filtered as described above to obtain  $V_j^{FFT}(t)$  (i.e., bandpass filtered traces in Fig.S5A). The mode power was evaluated (Fig.S5B) as an envelope of the squared offset-corrected bandpass filtered voltage  $(V_j^{FFT}(t))^2$ . The energy of the mode is estimated (Fig.S5C) as an integral under the envelope within a given time interval. Knowing the linear relation between acoustical SPL and the electric power in units of  $20\log(V)$  (Fig.S2C), it is possible to convert the received electric power and energy into absolute units of Watts and Joules assuming 100x difference in the microphone active areas (1cm diameter SvanTek and 1mm diameter MAX4466) that provides 20dB offset in power density. For example, Fig.S6B right y-axis is expressed in mW, while right y-axis in Fig.S5C in units of mJ. However, this conversion to absolute units can be used cautiously as the calibration does not consider reflection coefficient at the microphone membrane due to acoustic impedance mismatch. Therefore, since our main goal is a comparative study of powers and energies for different modes, whiskers, and excitation conditions, these quantities are presented in arbitrary units unless otherwise specified.

**Evaluation of modal group delay.** Modal group delay can be estimated as arrival time of the peak of the power envelope for corresponding FFT bandpass-filtered mode (Fig.S5D). An alternative method to consider spectral signatures of the mode beating due to reflection from the base is shown in Fig.3F,G. Group velocity estimated from group delay is consistent with the results obtained from mode beating as seen in Fig.3H.

**Measurements of damping ratio.** Wavelet transformation has varying resolution in time and frequency. For low frequencies, the wavelet is scaled wider for a greater frequency resolution accompanied by worse time resolution. At low frequencies below 200Hz (a typical value of the

fundamental frequency), the corresponding scale factor is about 1000 for voltage signals sampled at 20kS/s. The scaled wavelet has a full width at half maximum (FWHM) of 60ms. This hinders the identification of the damping coefficient for the modes below 200Hz using wavelet transform. Above 200Hz the FWHM of the scaled wavelet is below 2ms, capable of resolving the decay. Therefore, to measure damping ratio  $\zeta$  for each vibrational mode we used two separate approaches.

*Frequencies lower than 200Hz.* Identification of the central frequency and the damping coefficient of the fundamental and a few lower order modes below 200Hz from the CMW transformation is hindered by worsened frequency resolution ( $\Delta f/f > 10^{-4}$ ). Instead, to identify frequency and damping coefficient of the low order vibrational modes, the FFT bandpass filtered spectrum was fitted with a damped harmonic function [45]  $V(t) = A \cdot \exp(-2t/\tau) \cdot \sin(\omega_n(t - t_c) \cdot \pi/2)$  as illustrated by a dotted magenta line in Fig.S3. In this particular case the extracted frequency  $f = \omega_n/2\pi$  is  $82 \pm 3$ Hz and damping decay time  $\tau$  is  $0.0127 \pm 1.9E-4$  sec (damping ratio  $\zeta$  is 0.153).

*Frequencies higher than 200Hz.* Damping coefficients of the vibrational modes at frequencies  $f$  higher than 200Hz (where  $\Delta f/f < 10^{-4}$ ) were calculated from the slope of the wavelet spectrogram taken at the central frequency of corresponding mode. It has been shown [76] that for the multi-degree-of-freedom (MDOF) systems, the slope of the wavelet coefficient  $W_g x$  for a fixed scale (or dilation) parameter  $a_0$  is a linear function of time  $t$  and the mode angular frequency  $\omega_n$ :

$$\ln(W_g x)(a_0, t) \approx -\zeta \omega_n t + O(a_0) \quad \text{Eq.4}$$

Thus, the damping ratio  $\zeta = 1/\omega_n \tau$  of the mode can be estimated from the slope of the straight line of the wavelet modulus cross-section plotted in a semi-logarithmic scale (decay rate  $\lambda = 1/\tau$ ) as shown in Fig3A.

## Analytical and numerical simulations

**Calculation of natural eigenfrequencies.** In assumption of a small damping, the natural undamped frequencies of the modes  $f_j$  were obtained from the experimentally measured resonant frequencies  $f_j^R$  by compensating the damping-induced frequency shift following  $f_j = f_j^R / \sqrt{1 - \zeta^2}$ . Since measured damping ratios  $\zeta$  are not exceeding 0.35 (see Fig.3B,D) for the fundamental mode and are strongly decreasing for the higher order modes, this correction results in a slight adjustment (below 10%) of the fundamental mode frequency and is negligible for higher order modes.

To fit the natural frequencies of the modes for various truncations of a trimmed whisker (Fig.2) using Euler-Bernoulli model of Eq.1 we assumed that tapering is linear with length [24, 72, 73]. The variables  $\beta_j$  ( $\gamma_j$ ) are the dimensionless coefficients for full (truncated) whisker that depend on the eigenmode number [77] as well as on boundary conditions [47]. Table S2 shows dimensionless eigenmode coefficients  $\beta_j$  for the first 20 modes calculated for the fixed-free boundary conditions under various whisker truncation using the published MATLAB code [45]. Truncated ratios are defined as the ratio of the truncated length ( $l$ ) over the total arc length of the whisker ( $S_{tot}$ ). Note, that a fixed boundary condition at the whisker base is assumed here, which is a reasonable assumption for a whisker base glued to the microphone membrane. However, this might be different for a whisker suspended in a follicle [26].

**Numerical simulations of dynamical shear forces at the whisker base.** We calculated a time-dependent shear force (Fig.2A) generated at the base of the whisker after a slip-off from a pole using the MATLAB code [45]. The following parameters were used closely matching experimental results for B1 rat whisker trimmed to 29mm: untrimmed total arc length  $S_{tot}$  of 40mm, radius at the base  $R_b=60$ mm, density  $1000\text{kg/m}^3$ , Young's modulus 2GPa. For these calculations we assumed a frequency independent damping coefficient  $\alpha = 430$  rad/s for all modes [45]. Other parameters used in the code: Time\_step = 1e-5; Npoints = 10,000; Beta\_max = 30,000; Red\_factor = 100,000; Freq\_limit = 1,000,000; Zpoints = 5000; Xpoints = zpoints.

## Methods of analysis of video recordings

**Synching video frames.** Since the scanner was actuated through a conveyor belt to minimize vibrations, the lag in back and force movements resulted in a 5ms jitter. To better synchronize video frames to the microphone signal, an additional procedure was used. Within each sweeping period, the video frame that captures the whisker first touch (or collision) event was manually identified and then time-aligned to the onset of a large voltage peak in the microphone signal recording. Such peaks (i.e., Fig.S3 at  $t=0$ ) form a periodic pattern in a microphone signal recorded during consecutive sweeps and are identifiable with better than 0.25ms precision. An example is shown in Fig.S6C with frames time-synchronized to microphone recording of Fig.S6D.

**Postprocessing of videos.** Individual frames from recorded video were postprocessed as illustrated in Fig.S6. A single background image that was shot when whisker was outside the camera field of view, was subtracted from each original frame in a video (Fig.S6A) resulting in a high contrast processed frame (Fig.S6B). An example of a processed video is in SI Movie.3 and Movie.4.

**Evaluation of forces at the whisker base.** The force at the base of whisker was extracted from the whisker curvature following established methods [10]. In each postprocessed frame the coordinates along the whisker were segmented by thresholding and averaging over each y-coordinate. The coordinates obtained from this image segmentation agrees well with the results obtained with DeepLabCut [74] and with Whisk [42]. Then a 5<sup>th</sup> order polynomial was fitted to both x and y coordinates for arclength parametrization. The whisker curvature  $\kappa_p$  was estimated by fitting a second order polynomial to a whisker segment centered at one-third of a total whisker arc length. For the example shown in Fig.S6B, a 2mm whisker segment centered at 19mm arc length was used. The intrinsic whisker curvature was subtracted.

**Tip Acceleration.** From each postprocessed frame, the contact point between the tip of the whisker and the object was identified. The contact angle was defined as the clockwise angle between the horizontal axis and the contact point. The x-y spatial displacement of a 0.5mm whisker segment next to a contact point taken at a constant arc length was tracked through all frames. The spatial displacement was converted to angle velocity and angle acceleration using calculated contact angles and frames timestamps.

**Estimation of elastic strain energy.** Assuming that shear and torsional strain potential energies are negligible, the elastic strain potential energy  $U$  accumulated during the pinned phase can be estimated [78] as,

$$U = \frac{F^2 S_{tot}^3}{6EI} \quad \text{Eq.5}$$

where  $F$  is the force applied to a whisker. The latter can be estimated from the maximum curvature  $\kappa_p$  at the beginning of the unpinned phase [10] at a point  $p$  along the whisker arc,

$$F_p = \frac{\kappa_p E I_p}{r_p (\cos(\theta_p - \theta_{contact}))} \quad \text{Eq.6}$$

where  $I_p = \pi r_p a_p^4 / 4$  the second moment of inertia at point  $p$ ,  $a_p$  is a whisker radius at  $p$ ,  $r_p$  is the arm of the force at  $p$ ,  $\theta_p$  is an angle of vector connecting  $p$  to the site of whisker-object contact, and  $\theta_{contact}$  is an angle of a whisker at contact.

Combining Eqs.S2 and S3 we arrive to the following equation,

$$U = \frac{\pi}{24} \frac{\kappa_p^2 S_{tot}^3 E a_p^4}{r_p^2 (\cos(\theta_p - \theta_{contact}))^2} \quad \text{Eq.7}$$

**Estimation of vibrational energy delivered by a high-frequency modes.** To estimate how much energy is delivered to the follicle by high-frequency modes, it is instructive to check for the energy conservation in the three-phase pin-unpin-collision process. For the event 2 in Fig.5, the elastic strain potential energy  $U$  accumulated during the pinned phase can be estimated from the maximum curvature at the beginning of the unpinned phase (Eq.7), assuming that shear and torsional strain potential energies

are negligible. Part of this energy, equal to the drop of a curvature  $\Delta\kappa_p=0.26\text{mm}^{-1}$  at the transition to the unpinned phase in Fig.5, is transformed into a kinetic energy that can be estimated from Eq.7 as 6mJ. The upper limit of the impact energy released at the collision is equal to rotational kinetic energy  $K = I_p\omega^2/2$ . Assuming that rotational velocity at collision  $\omega=50\text{rad/s}$ , this gives the impact energy of about 4mJ. This corresponds to over 65% of the kinetic energy in the unpinned state showing reasonable conversion efficiency. The rest is most likely dissipated in a series of subsequent periodic collisions with diminishing amplitudes (see oscillations in acceleration in Fig.5C and Fig.5L also visible in the SI movie4). Therefore, the energy of a higher order mode#9 at 3800Hz that carries about 10% (Fig.6L) of a total released impact energy, is 400nJ. While arriving at the base, the energy is attenuated by 4dB (from damping in Fig.3A) down to 160nJ. An alternative estimate based on integrating the calibrated squared voltage trace of Fig.6D provides the total vibrational energy at the base as 2mJ and assigns similar 200nJ (10% energy fraction) to the mode#9. While for a whisker glued to a microphone most of this energy is reflected back due to large acoustical impedance mismatch, for a whisker in-vivo most of this energy is absorbed within a follicle due to much closer matching of impedances.

### Estimation of mutual information carried by high-frequency vibrations.

Artificial spike train of Fig.6E was generated by setting a threshold for the squared offset-corrected voltage (Fig.6D) to 0.04. Spikes were generated whenever the signal crossed a given threshold. To avoid unwanted digital noise during thresholding procedure the voltage traces were up-sampled from original 20Ks/s to 100Ks/s by linear extrapolation between neighboring datapoints. The artificial spike trains (Fig.6G) were generated for 10 nominally identical sweeping trials in Fig.6H (see also SM Movie.5) using the same threshold. The inter-spike interval (ISI) of Fig.6K was obtained for each trial by counting the temporal lags between all possible pairs of time bins with spikes and then averaged between all trials.

The spike train was digitized to 1 bit words by assigning 1 if spikes are present within a time bin  $\Delta t$  and 0 if absent [67]. The conditional probability of observing a spike at each time bin  $p(1|_t)$  was calculated by averaging the digitized artificial spike trains over all 10 trials during a time window of  $T=5\text{ms}$ . Probability of not observing a spike at the same time is  $p(0|_t) = 1 - p(1|_t)$ . The probability  $p(i)$  was determined by averaging  $p(i|_t)$  over all time bins. The total Shannon entropy  $S_{\text{total}}$  associated with bin size  $\Delta t$  could be determined as [67] :

$$S_{\text{total}} = -\sum p(i)\log_2 p(i) \quad \text{Eq.8}$$

where the sum is over all possible values of words (0 and 1 in this case).

The noise entropy  $S_{\text{noise}}$  associated with the time-dependent stimuli is estimated via the Direct Method [66, 67] assuming that stimuli in each time bin are independent. The noise entropy of the spike trains given the vibrational signal as stimulus was estimated by averaging entropy over all time bins:

$$S_{\text{noise}} = \langle -\sum p(i|_t)\log_2 p(i|_t) \rangle_t \quad \text{Eq.9}$$

The average mutual information for a time bin  $\Delta t$  was then determined by the difference in entropies [67]:

$$I = S_{\text{total}} - S_{\text{noise}} \quad \text{Eq.10}$$

The information rates per time bin  $\Delta t$  and per single spike were calculated by dividing the average mutual information  $I$  by the time bin  $\Delta t$  or by mean firing rate, correspondingly.

Since information rate estimated by DM is known to be biased due to noise entropy being sampled from a limited number of trials [79], the DM results were checked with a jackknifed method (JK) [80] that estimates entropy of all but the  $j$ -th trial out of  $N$  trials. The results of DM and JK mutual information rates for 5 and 10 trials differ by less than 3% presumably due to very low trial-to-trial variability. This is consistent with estimated sampling bias of 1% by quadratic expansion [66].

## REFERENCES

- [1] S.B. Vincent, The Functions of the Vibrissae in the Behavior of the White Rat, University of Chicago 1912.
- [2] P.M. Knutsen, M. Pietr, E. Ahissar, Haptic Object Localization in the Vibrissal System: Behavior and Performance, *The Journal of Neuroscience*, 26 (2006) 8451.
- [3] D.H. Connor, N.G. Clack, D. Huber, T. Komiyama, E.W. Myers, K. Svoboda, Vibrissa-Based Object Localization in Head-Fixed Mice, *The Journal of Neuroscience*, 30 (2010) 1947.
- [4] S.B. Mehta, D. Whitmer, R. Figueroa, B.A. Williams, D. Kleinfeld, Active Spatial Perception in the Vibrissa Scanning Sensorimotor System, *PLOS Biology*, 5 (2007) e15.
- [5] F. Anjum, H. Turni, P.G.H. Mulder, J. van der Burg, M. Brecht, Tactile guidance of prey capture in Etruscan shrews, *Proceedings of the National Academy of Sciences*, 103 (2006) 16544.
- [6] N.J. Sofroniew, Y.A. Vlasov, S.A. Hires, J. Freeman, K. Svoboda, Neural coding in barrel cortex during whisker-guided locomotion, *Elife*, 4 (2015) e12559.
- [7] N.J. Sofroniew, J.D. Cohen, A.K. Lee, K. Svoboda, Natural whisker-guided behavior by head-fixed mice in tactile virtual reality, *J Neurosci*, 34 (2014) 9537-9550.
- [8] N. Latham, G. Mason, From house mouse to mouse house: the behavioural biology of free-living *Mus musculus* and its implications in the laboratory, *Applied Animal Behaviour Science*, 86 (2004) 261-289.
- [9] J.A. Birdwell, J.H. Solomon, M. Thajchayapong, M.A. Taylor, M. Cheely, R.B. Towal, J. Conradt, M.J.Z. Hartmann, Biomechanical Models for Radial Distance Determination by the Rat Vibrissal System, *Journal of Neurophysiology*, 98 (2007) 2439-2455.
- [10] L. Pammer, D.H. Connor, S.A. Hires, N.G. Clack, D. Huber, E.W. Myers, K. Svoboda, The Mechanical Variables Underlying Object Localization along the Axis of the Whisker, *The Journal of Neuroscience*, 33 (2013) 6726.
- [11] J. Dörfel, The innervation of the mystacial region of the white mouse: A topographical study, *J Anat*, 142 (1985) 173-184.
- [12] E. Zucker, W.I. Welker, Coding of somatic sensory input by vibrissae neurons in the rat's trigeminal ganglion, *Brain Research*, 12 (1969) 138-156.
- [13] M. Szwed, K. Bagdasarian, E. Ahissar, Encoding of vibrissal active touch, *Neuron*, 40 (2003) 621-630.
- [14] P.M. Knutsen, E. Ahissar, Orthogonal coding of object location, *Trends in neurosciences*, 32 (2009) 101-109.
- [15] K.S. Severson, D. Xu, M. Van de Loo, L. Bai, D.D. Ginty, D.H. O'Connor, Active Touch and Self-Motion Encoding by Merkel Cell-Associated Afferents, *Neuron*, 94 (2017) 666-676.e669.
- [16] N.E. Bush, C.L. Schroeder, J.A. Hobbs, A.E. Yang, L.A. Huet, S.A. Solla, M.J. Hartmann, Decoupling kinematics and mechanics reveals coding properties of trigeminal ganglion neurons in the rat vibrissal system, *Elife*, 5 (2016).
- [17] D. Campagner, M.H. Evans, M.R. Bale, A. Erskine, R.S. Petersen, Prediction of primary somatosensory neuron activity during active tactile exploration, *eLife*, 5 (2016) e10696.
- [18] T. Furuta, N.E. Bush, A.E.-T. Yang, S. Ebara, N. Miyazaki, K. Murata, D. Hirai, K.-i. Shibata, M.J.Z. Hartmann, The Cellular and Mechanical Basis for Response Characteristics of Identified Primary Afferents in the Rat Vibrissal System, *Current Biology*, 30 (2020) 815-826.e815.
- [19] M.C. Stüttgen, J. Rüter, C. Schwarz, Two Psychophysical Channels of Whisker Deflection in Rats Align with Two Neuronal Classes of Primary Afferents, *The Journal of Neuroscience*, 26 (2006) 7933-7941.
- [20] S. Laturus, A. Hoffmann, S. Chakrabarti, C. Schwarz, Functional analysis of information rates conveyed by rat whisker-related trigeminal nuclei neurons, *Journal of Neurophysiology*, 125 (2021) 1517-1531.
- [21] K. Bagdasarian, M. Szwed, P.M. Knutsen, D. Deutsch, D. Derdikman, M. Pietr, E. Simony, E. Ahissar, Pre-neuronal morphological processing of object location by individual whiskers, *Nature neuroscience*, 16 (2013) 622-631.
- [22] J.T. Ritt, M.L. Andermann, C.I. Moore, Embodied information processing: vibrissa mechanics and texture features shape micromotions in actively sensing rats, *Neuron*, 57 (2008) 599-613.
- [23] S.A. Hires, L. Pammer, K. Svoboda, D. Golomb, Tapered whiskers are required for active tactile sensation, *Elife*, 2 (2013) e01350.
- [24] B.W. Quist, M.J.Z. Hartmann, Mechanical signals at the base of a rat vibrissa: the effect of intrinsic vibrissa curvature and implications for tactile exploration, *Journal of Neurophysiology*, 107 (2012) 2298-2312.



- [25] A.E.-T. Yang, H.M. Belli, M.J.Z. Hartmann, Quantification of vibrissal mechanical properties across the rat mystacial pad, *Journal of Neurophysiology*, 121 (2019) 1879-1895.
- [26] S. Haidarliu, E. Simony, D. Golomb, E. Ahissar, Collagenous skeleton of the rat mystacial pad, *Anatomical record (Hoboken, N.J. : 2007)*, 294 (2011) 764-773.
- [27] D. Kleinfeld, M. Deschênes, Neuronal basis for object location in the vibrissa scanning sensorimotor system, *Neuron*, 72 (2011) 455-468.
- [28] J.H. Solomon, M.J.Z. Hartmann, Radial distance determination in the rat vibrissal system and the effects of Weber's law, *Philosophical Transactions of the Royal Society B: Biological Sciences*, 366 (2011) 3049-3057.
- [29] G. Carvell, D. Simons, Biometric analyses of vibrissal tactile discrimination in the rat, *The Journal of Neuroscience*, 10 (1990) 2638-2648.
- [30] E. Lottem, R. Azouz, Mechanisms of Tactile Information Transmission through Whisker Vibrations, *The Journal of Neuroscience*, 29 (2009) 11686.
- [31] M.J. Hartmann, N.J. Johnson, R.B. Towal, C. Assad, Mechanical Characteristics of Rat Vibrissae: Resonant Frequencies and Damping in Isolated Whiskers and in the Awake Behaving Animal, *The Journal of Neuroscience*, 23 (2003) 6510.
- [32] M.A. Neimark, M.L. Andermann, J.J. Hopfield, C.I. Moore, Vibrissa Resonance as a Transduction Mechanism for Tactile Encoding, *The Journal of Neuroscience*, 23 (2003) 6499.
- [33] C.I. Moore, Frequency-Dependent Processing in the Vibrissa Sensory System, *Journal of Neurophysiology*, 91 (2004) 2390-2399.
- [34] E. Arabzadeh, E. Zorzin, M.E. Diamond, Neuronal Encoding of Texture in the Whisker Sensory Pathway, *PLOS Biology*, 3 (2005) e17.
- [35] S.P. Jadhav, J. Wolfe, D.E. Feldman, Sparse temporal coding of elementary tactile features during active whisker sensation, *Nature neuroscience*, 12 (2009) 792-800.
- [36] J. Wolfe, D.N. Hill, S. Pahlavan, P.J. Drew, D. Kleinfeld, D.E. Feldman, Texture Coding in the Rat Whisker System: Slip-Stick Versus Differential Resonance, *PLOS Biology*, 6 (2008) e215.
- [37] E. Arabzadeh, S. Panzeri, M.E. Diamond, Whisker Vibration Information Carried by Rat Barrel Cortex Neurons, *The Journal of Neuroscience*, 24 (2004) 6011-6020.
- [38] B.R. Isett, S.H. Feasel, M.A. Lane, D.E. Feldman, Slip-Based Coding of Local Shape and Texture in Mouse S1, *Neuron*, 97 (2018) 418-433.e415.
- [39] T. Bessaih, M.J. Higley, D. Contreras, Millisecond precision temporal encoding of stimulus features during cortically generated gamma oscillations in the rat somatosensory cortex, *The Journal of physiology*, 596 (2018) 515-534.
- [40] M.R. Bale, D. Campagner, A. Erskine, R.S. Petersen, Microsecond-Scale Timing Precision in Rodent Trigeminal Primary Afferents, *The Journal of Neuroscience*, 35 (2015) 5935-5940.
- [41] P.M. Knutsen, D. Derdikman, E. Ahissar, Tracking whisker and head movements in unrestrained behaving rodents, *J Neurophysiol*, 93 (2005) 2294-2301.
- [42] N.G. Clack, D.H. O'Connor, D. Huber, L. Petreanu, A. Hires, S. Peron, K. Svoboda, E.W. Myers, Automated Tracking of Whiskers in Videos of Head Fixed Rodents, *PLoS computational biology*, 8 (2012) e1002591.
- [43] Y. Boubenec, D. Shulz, G. Debregeas, Whisker encoding of mechanical events during active tactile exploration, *Frontiers in Behavioral Neuroscience*, 6 (2012).
- [44] L.N. Claverie, Y. Boubenec, G. Debrégeas, A.M. Prevost, E. Wandersman, Whisker Contact Detection of Rodents Based on Slow and Fast Mechanical Inputs, *Frontiers in Behavioral Neuroscience*, 10 (2017).
- [45] R. Vaxenburg, I. Wyche, K. Svoboda, A.L. Efros, S.A. Hires, Dynamic cues for whisker-based object localization: An analytical solution to vibration during active whisker touch, *PLoS computational biology*, 14 (2018) e1006032.
- [46] S.A. Hires, A. Schuyler, J. Sy, V. Huang, I. Wyche, X. Wang, D. Golomb, Beyond cones: an improved model of whisker bending based on measured mechanics and tapering, *Journal of Neurophysiology*, 116 (2016) 812-824.
- [47] W. Yan, Q. Kan, K. Kergrene, G. Kang, X.-Q. Feng, R. Rajan, A truncated conical beam model for analysis of the vibration of rat whiskers, *Journal of Biomechanics*, 46 (2013) 1987-1995.
- [48] B.W. Quist, R.A. Faruqi, M.J.Z. Hartmann, Variation in Young's modulus along the length of a rat vibrissa, *Journal of Biomechanics*, 44 (2011) 2775-2781.

- [49] N. Makris, Frequency-independent dissipation and causality, in: P. Spanos (Ed.) Computational Stochastic Mechanics, Balkema, Rotterdam, 1999, pp. 435-442.
- [50] S. Adhikari, Damping models for structural vibration, Oxford University 2000.
- [51] S. Adhikari, J. Woodhouse, Identification of damping. Part 1 Viscous damping, Journal of Sound and Vibration, 243 (2001) 43-61.
- [52] M. Oladazimi, T. Putelat, R. Szalai, K. Noda, I. Shimoyama, A. Champneys, C. Schwarz, Conveyance of texture signals along a rat whisker, Scientific Reports, 11 (2021) 13570.
- [53] J.F. Doyle, Wave Propagation in Structures, 2 ed., Springer 1997.
- [54] P. Dallos, A.N. Popper, R.R. Fay, The cochlea, Springer 1996.
- [55] Sanjeev S. Ranade, R. Syeda, A. Patapoutian, Mechanically Activated Ion Channels, Neuron, 87 (2015) 1162-1179.
- [56] L.R. Manfredi, A.T. Baker, D.O. Elias, J.F. Dammann, III, M.C. Zielinski, V.S. Polashock, S.J. Bensmaia, The Effect of Surface Wave Propagation on Neural Responses to Vibration in Primate Glabrous Skin, PLOS ONE, 7 (2012) e31203.
- [57] E.L. Mackevicius, M.D. Best, H.P. Saal, S.J. Bensmaia, Millisecond Precision Spike Timing Shapes Tactile Perception, The Journal of Neuroscience, 32 (2012) 15309.
- [58] Victoria E. Abraira, David D. Ginty, The Sensory Neurons of Touch, Neuron, 79 (2013) 618-639.
- [59] D.M. Cain, S.G. Khasabov, D.A. Simone, Response Properties of Mechanoreceptors and Nociceptors in Mouse Glabrous Skin: An In Vivo Study, Journal of Neurophysiology, 85 (2001) 1561-1574.
- [60] T. Shimozawa, J. Murakami, T. Kumagai, Cricket Wind Receptors: Thermal Noise for the Highest Sensitivity Known, in: F.G. Barth, J.A.C. Humphrey, T.W. Secomb (Eds.) Sensors and Sensing in Biology and Engineering, Springer Vienna, Vienna, 2003, pp. 145-157.
- [61] T.A.S. Ewert, C. Vahle-Hinz, A.K. Engel, High-frequency whisker vibration is encoded by phase-locked responses of neurons in the rat's barrel cortex, The Journal of neuroscience : the official journal of the Society for Neuroscience, 28 (2008) 5359-5368.
- [62] M.A. Harvey, H.P. Saal, J.F. Dammann, III, S.J. Bensmaia, Multiplexing Stimulus Information through Rate and Temporal Codes in Primate Somatosensory Cortex, PLOS Biology, 11 (2013) e1001558.
- [63] J.M. Park, Y.K. Hong, C.C. Rodgers, J.B. Dahan, E.R. Schmidt, R.M. Bruno, Deep and superficial layers of the primary somatosensory cortex are critical for whisker-based texture discrimination in mice, bioRxiv, DOI 10.1101/2020.08.12.245381 (2020) 2020.2008.2012.245381.
- [64] Y. Boubenec, L.N. Clavierie, D.E. Shulz, G. Debrégeas, An Amplitude Modulation/Demodulation Scheme for Whisker-Based Texture Perception, The Journal of Neuroscience, 34 (2014) 10832-10843.
- [65] E.R. Harrell, M.A. Goldin, B. Bathellier, D.E. Shulz, An elaborate sweep-stick code in rat barrel cortex, Science Advances, 6 (2020) eabb7189.
- [66] R.R. de Ruyter van Steveninck, G.D. Lewen, S.P. Strong, R. Koberle, W. Bialek, Reproducibility and variability in neural spike trains, Science (New York, N.Y.), 275 (1997) 1805-1808.
- [67] S.P. Strong, R. Koberle, R.R. de Ruyter van Steveninck, W. Bialek, Entropy and Information in Neural Spike Trains, Physical Review Letters, 80 (1998) 197-200.
- [68] A. Rokem, S. Watzl, T. Gollisch, M. Stemmler, A.V.M. Herz, I. Samengo, Spike-Timing Precision Underlies the Coding Efficiency of Auditory Receptor Neurons, Journal of Neurophysiology, 95 (2006) 2541-2552.
- [69] S.B. Laughlin, Energy as a constraint on the coding and processing of sensory information, Current opinion in neurobiology, 11 (2001) 475-480.
- [70] S. Schreiber, C.K. Machens, A.V. Herz, S.B. Laughlin, Energy-efficient coding with discrete stochastic events, Neural Comput, 14 (2002) 1323-1346.
- [71] A. Forench, V. Kamchevska, N. Dupuis, B.G. Lee, C.W. Baks, G. Papen, L. Schares, A Dynamically-Reconfigurable Burst-Mode Link Using a Nanosecond Photonic Switch, Journal of Lightwave Technology, 38 (2020) 1330-1340.
- [72] R.B. Towal, B.W. Quist, V. Gopal, J.H. Solomon, M.J.Z. Hartmann, The Morphology of the Rat Vibrissal Array: A Model for Quantifying Spatiotemporal Patterns of Whisker-Object Contact, PLoS computational biology, 7 (2011) e1001120.

- [73] H.M. Belli, A.E.T. Yang, C.S. Bresee, M.J.Z. Hartmann, Variations in vibrissal geometry across the rat mystacial pad: base diameter, medulla, and taper, *Journal of Neurophysiology*, 117 (2017) 1807-1820.
- [74] A. Mathis, P. Mamidanna, K.M. Cury, T. Abe, V.N. Murthy, M.W. Mathis, M. Bethge, DeepLabCut: markerless pose estimation of user-defined body parts with deep learning, *Nature neuroscience*, 21 (2018) 1281-1289.
- [75] S. Mallat, VI - Wavelet zoom, in: S. Mallat (Ed.) *A Wavelet Tour of Signal Processing (Second Edition)*, Academic Press, San Diego, 1999, pp. 163-219.
- [76] W.J. Staszewski, Identification of damping in MDOF systems using timescale decomposition, *Journal of Sound and Vibration*, 203 (1997) 283-305.
- [77] H.D. Conway, E.C.H. Becker, J.F. Dubil, Vibration Frequencies of Tapered Bars and Circular Plates, *Journal of Applied Mechanics*, 31 (1964) 329-331.
- [78] F. Beer, E.R. Johnston, J. DeWolf, D. Mazurek, *Mechanics of Materials*, 8th Edition ed., Mcgraw Hill 2020.
- [79] S. Panzeri, A. Treves, Analytical estimates of limited sampling biases in different information measures, *Network (Bristol, England)*, 7 (1996) 87-107.
- [80] L. Paninski, Estimation of Entropy and Mutual Information, *Neural Computation*, 15 (2003) 1191-1253.

## Supplementary Materials for

### Pre-neuronal processing of haptic sensory cues via dispersive high-frequency vibrational modes

Yu Ding, Yurii Vlasov\*

\*Corresponding author. Email: yvlasov@illinois.edu

**Fig.S1. Whisker micromotions acquisition system.**

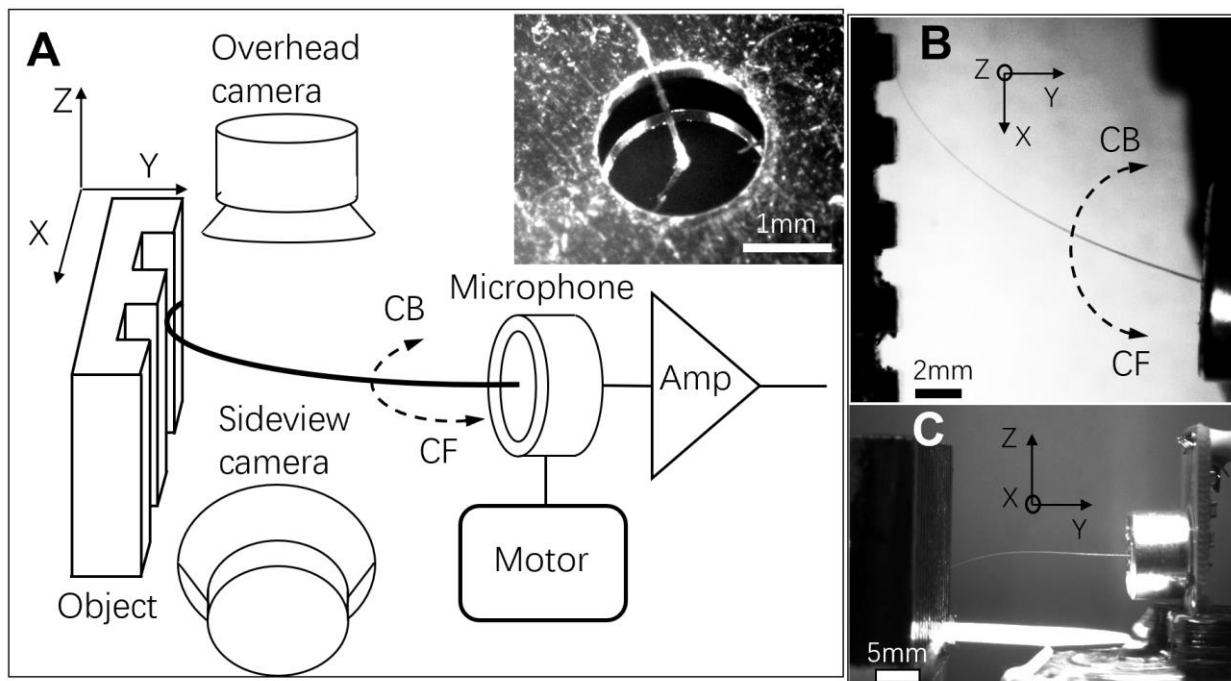

**(A)** Schematic of the experimental setup. Inset: Photograph of a whisker glued to the electret membrane of electret condenser microphone. Vibrations induced on the membrane was transformed into voltage traces, amplified, and recorded. The microphone was swept in the xy plane using a stepper motor. Whisker intrinsic curvature was oriented to align with the sweeping plane thus defining convex forward (CF) and convex backward (CB) directions. An object (here a grating) was placed at y distance from a whisker base, deflecting the whisker during sweeping motion. **(B)** A frame image of a whisker micromotions in the xy plane captured with the overhead camera. **(C)** A frame image of a whisker micromotions in the yx plane captured with the sideview camera.

**Table S1. Measured parameters of whiskers**

| # | Whisker  | $R_b$<br>( $\mu\text{m}$ ) | $S_{\text{tot}}$<br>(mm) | $\text{Slope}_R$<br>( $\times 10^{-3}$ ) | Bending<br>(A) |
|---|----------|----------------------------|--------------------------|------------------------------------------|----------------|
| 1 | Rat B1   | 60                         | 40.0                     | 1.45                                     | 1.0            |
| 2 | Mouse C1 | 37                         | 21.5                     | 1.53                                     | 1.9            |
| 3 | Mouse C2 | 35                         | 24.1                     | 1.48                                     | 1.1            |

**Table S2. Example parameters for the FFT bandpass filtering.**

| FFT band number | Mode central frequency (Hz) | Lower cutoff (Hz) | Upper cutoff (Hz) |
|-----------------|-----------------------------|-------------------|-------------------|
| 1               | 90                          | 10                | 150               |
| 2               | 270                         | 150               | 400               |
| 3               | 550                         | 400               | 700               |
| 4               | 1000                        | 700               | 1200              |
| 5               | 1600                        | 1200              | 1800              |
| 6               | 2300                        | 1900              | 2600              |
| 7               | 3300                        | 2600              | 3700              |

**Table S3: Dimensionless eigenmode coefficients for truncated conical beam**

|    | 0       | 0.1     | 0.2     | 0.3     | 0.4     | 0.5      | 0.6      | 0.7      | 0.8      | 0.9       |
|----|---------|---------|---------|---------|---------|----------|----------|----------|----------|-----------|
| 1  | 8.72    | 8.89    | 9.68    | 11.24   | 13.91   | 18.50    | 26.99    | 45.19    | 96.38    | 367.37    |
| 2  | 21.15   | 23.06   | 28.73   | 38.04   | 52.96   | 78.19    | 125.31   | 228.39   | 526.42   | 2155.03   |
| 3  | 38.45   | 45.83   | 62.24   | 87.37   | 127.05  | 194.32   | 320.84   | 600.17   | 1415.76  | 5918.86   |
| 4  | 60.68   | 78.40   | 111.32  | 160.25  | 237.07  | 367.25   | 612.53   | 1155.28  | 2744.07  | 11539.78  |
| 5  | 87.83   | 121.19  | 176.29  | 257.04  | 383.43  | 597.56   | 1001.23  | 1895.30  | 4515.27  | 19035.68  |
| 6  | 119.92  | 174.36  | 257.29  | 377.85  | 566.24  | 885.31   | 1486.99  | 2820.22  | 6729.15  | 28405.39  |
| 7  | 156.94  | 237.98  | 354.37  | 522.74  | 785.52  | 1230.55  | 2069.85  | 3930.07  | 9385.75  | 39648.10  |
| 8  | 198.90  | 312.08  | 467.55  | 691.71  | 1041.31 | 1633.28  | 2749.81  | 5224.86  | 12485.10 | 52766.52  |
| 9  | 245.80  | 396.70  | 596.85  | 884.78  | 1333.61 | 2093.53  | 3526.88  | 6704.60  | 16027.19 | 67757.95  |
| 10 | 297.64  | 491.83  | 742.27  | 1101.96 | 1662.43 | 2611.28  | 4401.07  | 8369.29  | 20012.03 | 84623.30  |
| 11 | 354.43  | 597.49  | 903.83  | 1343.25 | 2027.76 | 3186.56  | 5372.39  | 10218.95 | 24439.62 | 103362.57 |
| 12 | 416.18  | 713.69  | 1081.53 | 1608.66 | 2429.63 | 3819.35  | 6440.83  | 12253.56 | 29309.97 |           |
| 13 | 482.90  | 840.43  | 1275.37 | 1898.19 | 2868.01 | 4509.66  | 7606.40  | 14473.13 | 34623.07 |           |
| 14 | 554.59  | 977.71  | 1485.35 | 2211.83 | 3342.92 | 5257.49  | 8869.09  | 16877.66 | 40378.92 |           |
| 15 | 631.27  | 1125.54 | 1711.47 | 2549.60 | 3854.36 | 6062.85  | 10228.91 | 19467.16 | 46577.53 |           |
| 16 | 712.96  | 1283.92 | 1953.74 | 2911.49 | 4402.33 | 6925.73  | 11685.86 | 22241.61 | 53218.90 |           |
| 17 | 799.70  | 1452.84 | 2212.16 | 3297.50 | 4986.82 | 7846.13  | 13239.93 | 25201.03 | 60303.02 |           |
| 18 | 891.40  | 1632.31 | 2486.72 | 3707.64 | 5607.85 | 8824.05  | 14891.14 | 28345.40 | 67829.90 |           |
| 19 | 988.19  | 1822.33 | 2777.43 | 4141.89 | 6265.40 | 9859.50  | 16639.47 | 31674.74 | 75799.53 |           |
| 20 | 1090.05 | 2022.91 | 3084.29 | 4600.27 | 6959.48 | 10952.47 | 18484.93 | 35189.05 | 84211.93 |           |

**Fig.S2. Calibration of acoustic system.**

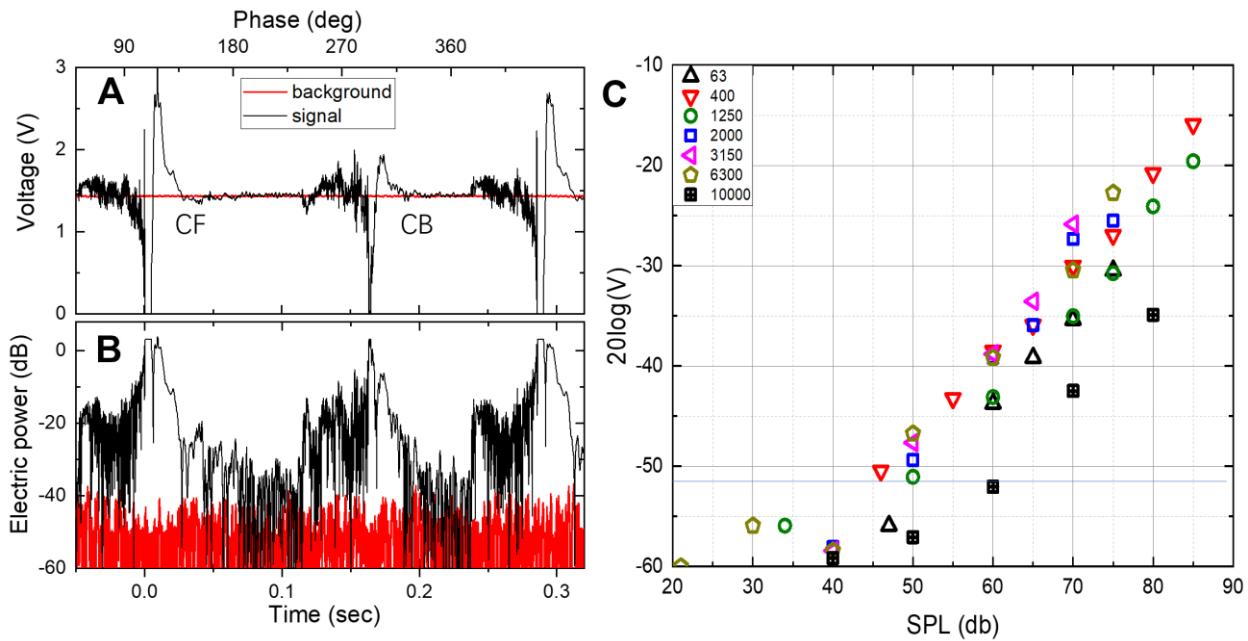

**(A)** Voltage trace recorded with a C1 mouse whisker (black) with a total arc length of 22mm swept at 3.5Hz rate against the pole located 2mm apart from the whisker tip. For comparison, a background trace (red) without motor movement is recorded. **(B)** Electric power calculated from voltage traces for signal (black) and background (red) demonstrating over 50dB dynamic range. **(C)** The electric power (dB) from the electret microphone with attached whisker is plotted as a function of the acoustic field strength (SPL dB). Different symbols with different colors represent calibration at different frequencies (63-10,000Hz).

**Fig.S3. Interaction with a pole**

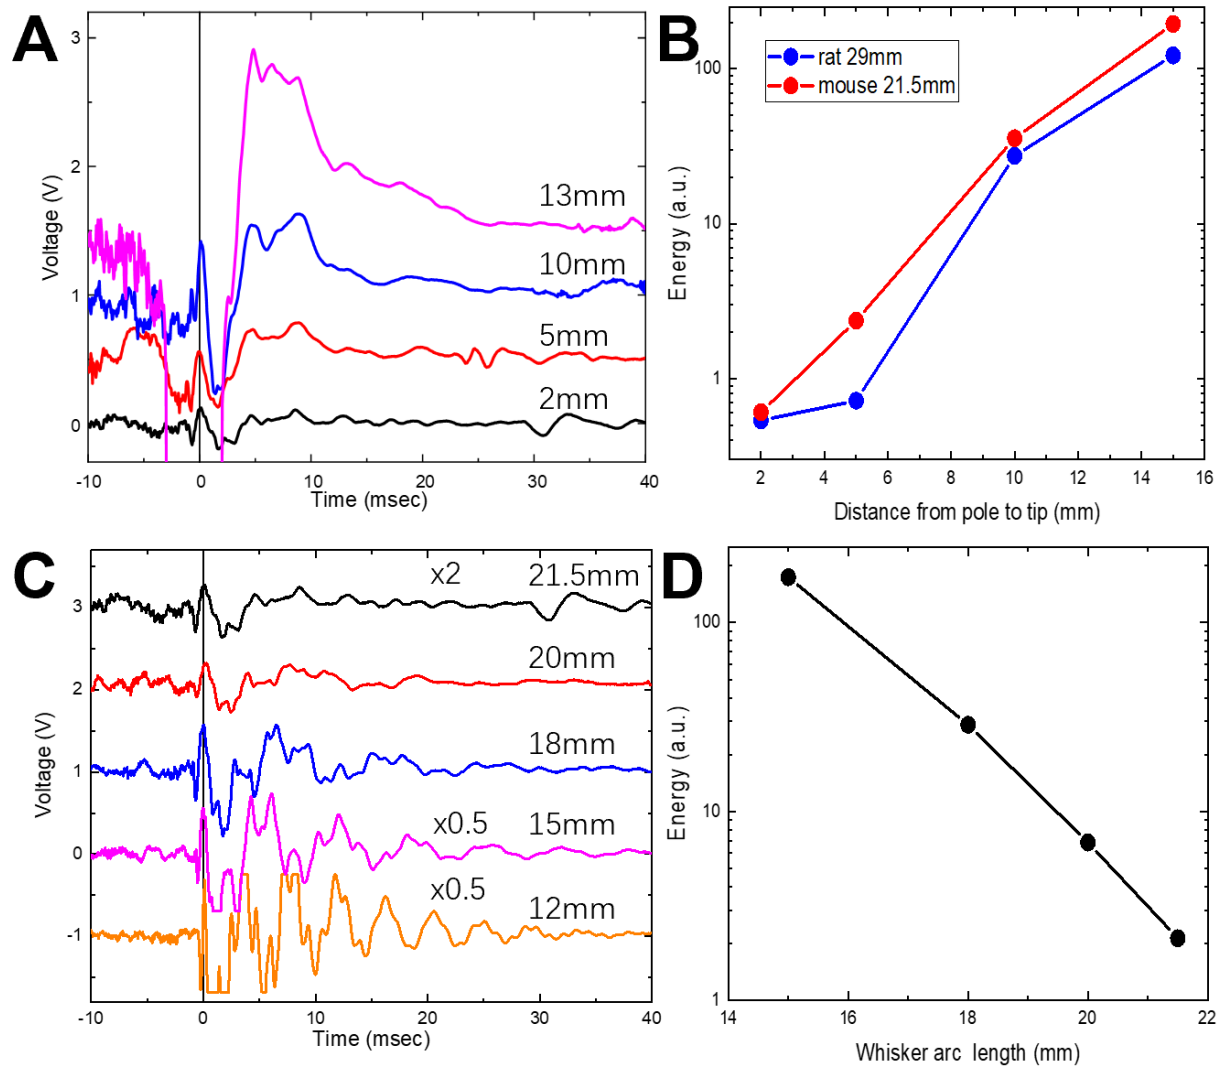

**(A)** Voltage traces recorded with a C1 mouse whisker with a total arc length of 21.5mm swept at 3.5Hz rate against the pole located at different distances from the whisker tip. Traces are shifted vertically by 0.5V with respect to each other for clarity. **(B)** Energy of vibrations calculated as an integral under the squared voltage traces in A) for [0..30] ms time interval. **(C)** Voltage traces recorded with a C1 mouse whisker that is consecutively trimmed from initial 21.5mm to 12mm total arc length. The distance between a pole and the whisker tip is kept constant as 2mm. Traces are shifted vertically by 1V with respect to each other for clarity. Voltage traces for 12, 15, and 21.5mm are scaled with the multipliers shown. Note amplitude clipping of 12mm voltage trace due to saturation of an op-amp amplifier. **(D)** Energy of vibrations calculated as an integral under the squared voltage traces in C) for [0..30] ms time interval.

**Fig.S4. Interaction with a textured surface**

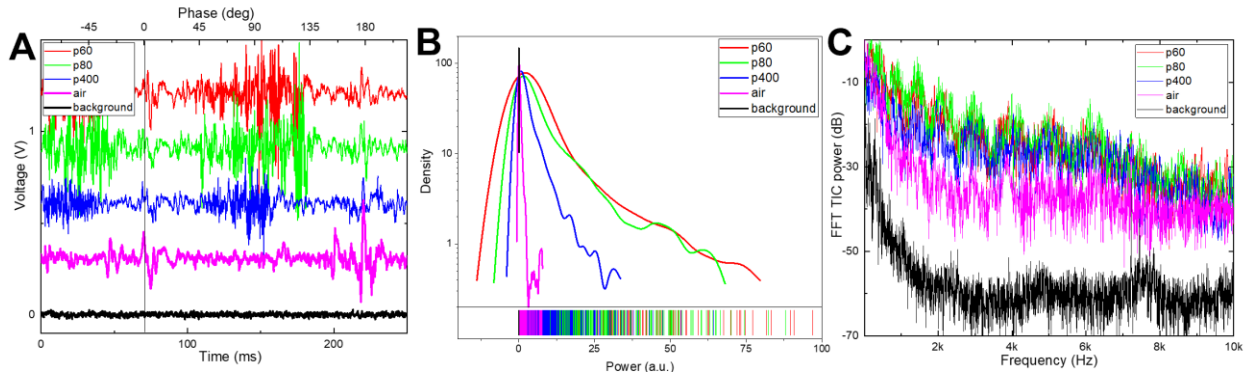

**(A)** Voltage traces recorded with a C1 mouse whisker trimmed to a total arc length of 21.5mm swept at 3.5Hz rate against the sandpapers with different grit numbers. The sandpapers are located at 2mm from the whisker tip. Traces are shifted vertically by 0.25V with respect to each other for clarity. Traces for scanning of a whisker in the air (magenta) and the background noise level with scanning stopped (black) are shown for comparison. **(B)** Distribution and rug plots for traces in A). **(C)** FFT power spectra for voltage traces in A).



**Fig.S5. FFT bandpass filtering procedure.**

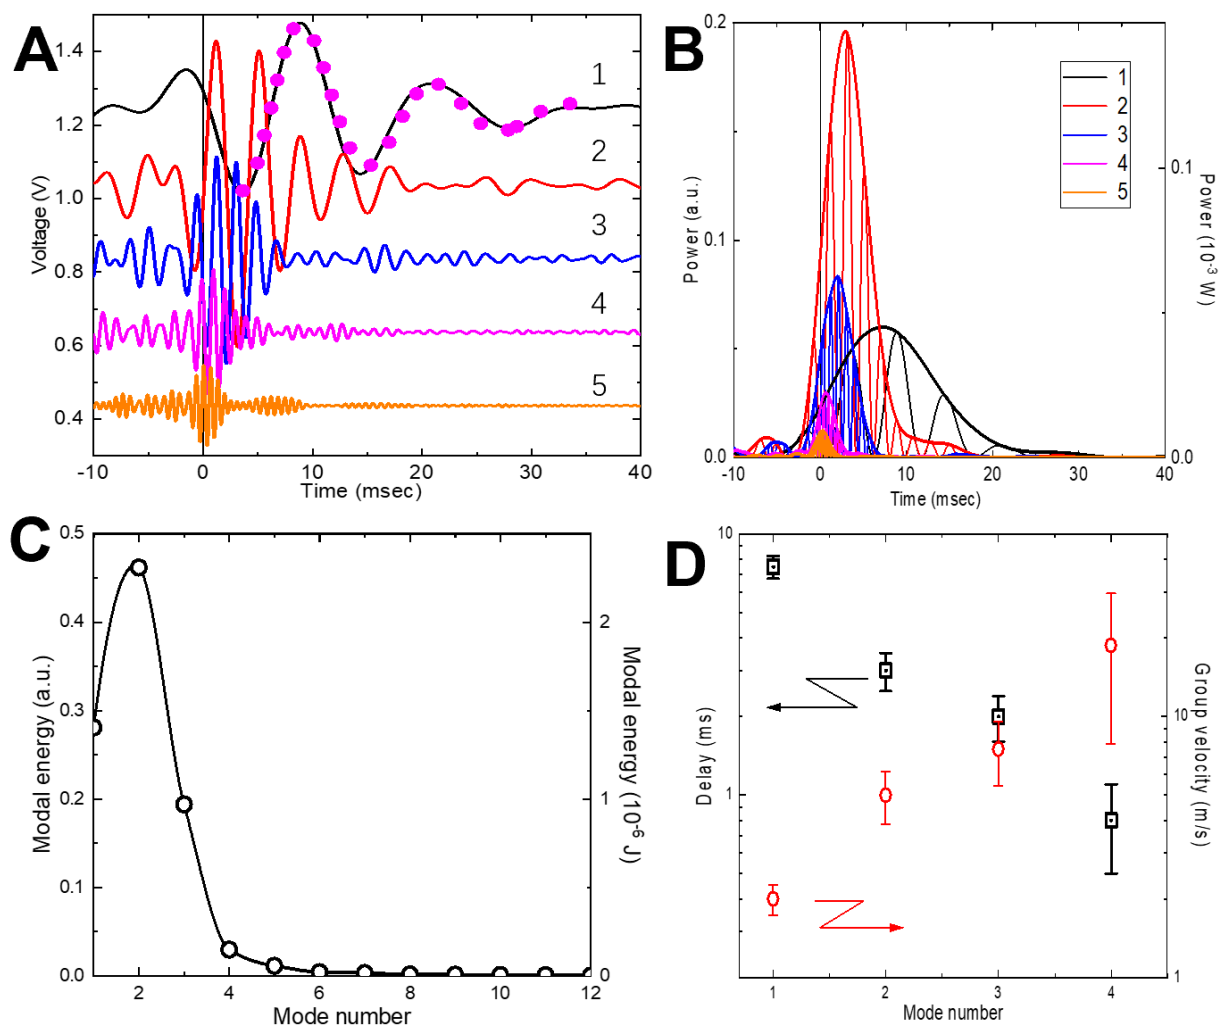

**(A)** Voltage traces recorded with a C1 mouse whisker (black) with a total arc length of 20mm swept at 3.5Hz rate against the pole located 2mm apart from the whisker tip. Traces marked 1 through 5 correspond to FFT-filtered bands according to filters cutoffs in the Table S1. Filtered spectra are shifted vertically by 0.2V for clarity. Dotted magenta curve on top of the spectrum 2 is a fitting using a damped sinusoidal function. **(B)** Plot of squared voltages in A) and their envelopes. Modal power is proportional to the magnitude of the envelope. **(C)** Modal energy calculated as an integral under the envelope over a [-5..30] ms interval. Note that second order mode has the highest power. **(D)** Modal group delay and group velocity calculated at the maxima of the power envelopes for corresponding modes in B).

**Fig.S6. Video postprocessing.**

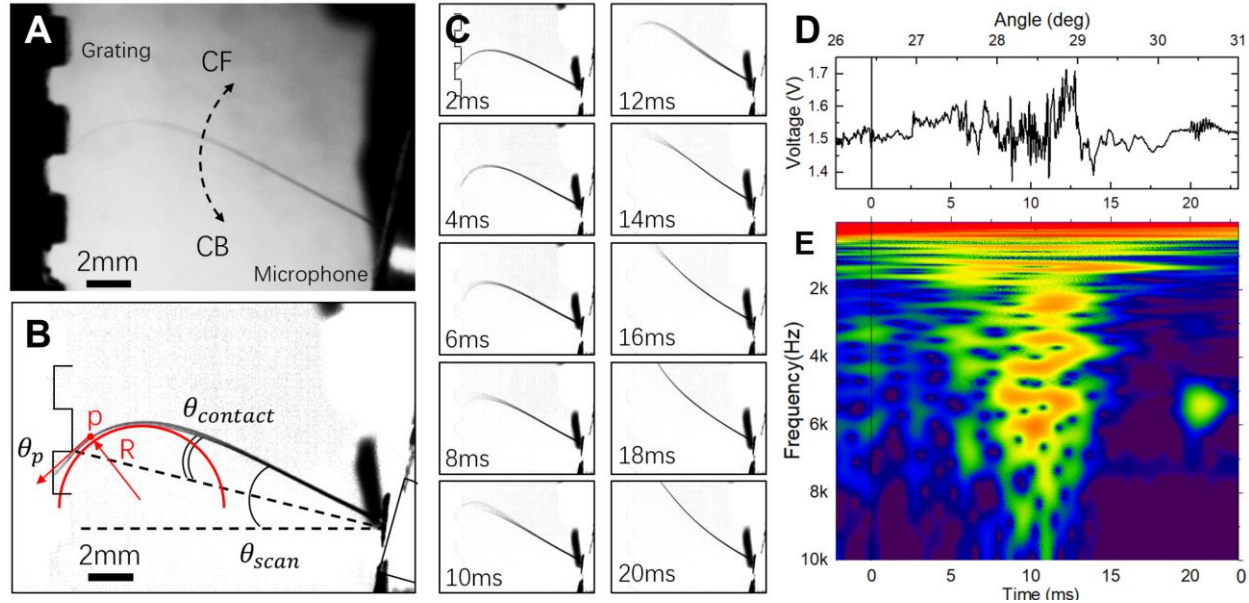

**(A)** Single frame of a video recorded at 1000fps of a mouse whisker swiped over a grating. **(B)** Background subtracted frame with schematics for determination of the contact angle, three reference points (red circles) at 2mm, 3mm, and 4mm from the tip and resulting axial and tangential forces at the base. **(C)** Series of background subtracted frames that are time-synchronized with the microphone voltage recording. Every second frame of a 1000fps video is shown. **(D)** Voltage trace that is time synchronized to a video in C). **(E)** CMW spectrogram for D).

**SM Movie 1: Spectral analysis of whisker interaction with a pole.** Voltage trace (top) of a C1 21.5mm mouse whisker swept over a pole at 10mm distance from the tip. Video (bottom) is composed of 10 CMW spectrograms calculated from 10 consecutive sweeps. Note highly reproducible regular pattern of modal vibrations at times corresponding to a whisker slipping off the pole (downward red arrows) and collision with the pole (upward arrows). Note also, that at the first touch the eigenmodes pattern corresponds to a shorter whisker arc than for a slip-off. Corresponding upward chirp in eigenmodes frequencies is schematically shown by white dashed lines.

**SM Movie 2: Spectral analysis of whisker interaction with a textured surface.** Voltage trace (top) of a B1 40mm rat whisker swept over a sandpaper with p60 grit value located at 2mm distance from the tip. Video (bottom) is composed of 10 CMW spectrograms calculated from 10 consecutive CF sweeps. Note highly reproducible regular pattern of modal vibrations at times corresponding to a whisker slipping off the sandpaper surface (downward red arrow) and first contact with the sandpaper (upward arrow). Events *a*, and *b* discussed in relation to Fig.4A,B are marked by downward red arrows.

**SM Movie 3: Whisker swipe over grating – Fig.S6.** Background-subtracted 1000fps video of a mouse whisker scanned over a 2mm pitch grating (same results as in Fig.S6). Note blurring of the images when whisker is vibrating at frequencies beyond 1000Hz.

**SM Movie 4: High-speed collisions during sweeping over a grating – Fig.5.** Background-subtracted video of a C2 mouse 24.1mm long whisker during a single CB sweep over a grating recorded at 1460fps (same results as in Fig.5). Image of the whisker (thinner bottom trace) is accompanied by an image of the whisker shadow projected on a screen (thick upper trace). Note, that the view of a whisker tip is blocked by a grating teeth. The position of a teeth at the plane of a sweep (left) and the microphone base (right) are shown by rectangular shapes. Events marked 1, 2, and 3 correspond to interaction with individual grating teeth as in Fig.5. Overlaid are the whisker shapes extracted from consecutive 160 frames.

**SM Movie 5: Spectral analysis of interaction of a whisker with a grating for Fig.5.**

Typical voltage trace (top) of a mouse C2 whisker with 24.1mm arc during a single CB sweep over a grating. Events marked 1, 2, and 3 correspond to interaction with individual grating teeth as in Fig.5. Video (bottom) is composed of 10 CMW spectrograms calculated from 10 consecutive CB sweeps. Time for each spectrogram is aligned to the start of event 2.
